# Supplementary material
Source: MDPI journal article supplement (https://www.mdpi.com/2073-4441/13/4/417)
Supplement: s1 [file s1]

## Sheet: Sheet1
Date-Limoneto	Temperature-Limoneto (°C)	Date-Rain	Rain (mm/day)	Date-COA-SAIBBO	Temperature-COA (°C)	Temperature-Saibbo (°C)
2017-07-01 00:03:00	37.8964	2019-07-01	0	2019-07-07 14:00:00	39.1134
2017-07-01 00:18:00	37.8947	2019-07-02	0	2019-07-07 15:00:00	39.5246
2017-07-01 00:33:00	37.8981	2019-07-03	0	2019-07-07 16:00:00	39.6008
2017-07-01 00:48:00	37.8981	2019-07-04	0	2019-07-07 17:00:00	39.6098
2017-07-01 01:03:00	37.8964	2019-07-05	0	2019-07-07 18:00:00	39.6152
2017-07-01 01:18:00	37.8964	2019-07-06	0	2019-07-07 19:00:00	39.6189
2017-07-01 01:33:00	37.8981	2019-07-07	0	2019-07-07 20:00:00	39.626
2017-07-01 01:48:00	37.8964	2019-07-08	0	2019-07-07 21:00:00	39.6297
2017-07-01 02:03:00	37.8964	2019-07-09	0	2019-07-07 22:00:00	39.6387
2017-07-01 02:18:00	37.8964	2019-07-10	0	2019-07-07 23:00:00	39.6458
2017-07-01 02:33:00	37.8981	2019-07-11	0	2019-07-08	39.6548
2017-07-01 02:48:00	37.8981	2019-07-12	0	2019-07-08 01:00:00	39.662
2017-07-01 03:03:00	37.8981	2019-07-13	0	2019-07-08 02:00:00	39.6692
2017-07-01 03:18:00	37.8999	2019-07-14	0	2019-07-08 03:00:00	39.6781
2017-07-01 03:33:00	37.8981	2019-07-15	1.02	2019-07-08 04:00:00	39.6853
2017-07-01 03:48:00	37.8999	2019-07-16	1.02	2019-07-08 05:00:00	39.6996
2017-07-01 04:03:00	37.9016	2019-07-17	0	2019-07-08 06:00:00	39.705
2017-07-01 04:18:00	37.9016	2019-07-18	0	2019-07-08 07:00:00	39.714
2017-07-01 04:33:00	37.8999	2019-07-19	0	2019-07-08 08:00:00	39.7265
2017-07-01 04:48:00	37.9016	2019-07-20	0	2019-07-08 09:00:00	39.7355
2017-07-01 05:03:00	37.8999	2019-07-21	0	2019-07-08 10:00:00	39.7409
2017-07-01 05:18:00	37.9033	2019-07-22	0	2019-07-08 11:00:00	39.7516
2017-07-01 05:33:00	37.9016	2019-07-23	0	2019-07-08 12:00:00	39.7588
2017-07-01 05:48:00	37.9033	2019-07-24	0	2019-07-08 13:00:00	39.7678
2017-07-01 06:03:00	37.8999	2019-07-25	0	2019-07-08 14:00:00	39.775
2017-07-01 06:18:00	37.9033	2019-07-26	0	2019-07-08 15:00:00	39.7839
2017-07-01 06:33:00	37.9033	2019-07-27	0	2019-07-08 16:00:00	39.7947
2017-07-01 06:48:00	37.9016	2019-07-28	0	2019-07-08 17:00:00	39.8019
2017-07-01 07:03:00	37.9016	2019-07-29	0	2019-07-08 18:00:00	39.809
2017-07-01 07:18:00	37.9016	2019-07-30	0	2019-07-08 19:00:00	39.8145
2017-07-01 07:33:00	37.9033	2019-07-31	0	2019-07-08 20:00:00	39.8216
2017-07-01 07:48:00	37.9016	2019-08-01	0	2019-07-08 21:00:00	39.8253
2017-07-01 08:03:00	37.9033	2019-08-02	0	2019-07-08 22:00:00	39.8325
2017-07-01 08:18:00	37.9033	2019-08-03	0	2019-07-08 23:00:00	39.8344
2017-07-01 08:33:00	37.9033	2019-08-04	0	2019-07-09	39.8398
2017-07-01 08:48:00	37.9033	2019-08-05	0	2019-07-09 01:00:00	39.8452
2017-07-01 09:03:00	37.9033	2019-08-06	0	2019-07-09 02:00:00	39.8541
2017-07-01 09:18:00	37.9033	2019-08-07	0	2019-07-09 03:00:00	39.8578
2017-07-01 09:33:00	37.8999	2019-08-08	0	2019-07-09 04:00:00	39.8632
2017-07-01 09:48:00	37.8999	2019-08-09	0	2019-07-09 05:00:00	39.8739
2017-07-01 10:03:00	37.8999	2019-08-10	0	2019-07-09 06:00:00	39.8811
2017-07-01 10:18:00	37.8999	2019-08-11	0	2019-07-09 07:00:00	39.8848
2017-07-01 10:33:00	37.8999	2019-08-12	0	2019-07-09 08:00:00	39.892
2017-07-01 10:48:00	37.9033	2019-08-13	0	2019-07-09 09:00:00	39.8974
2017-07-01 11:03:00	37.8999	2019-08-14	0	2019-07-09 10:00:00	39.9046
2017-07-01 11:18:00	37.8981	2019-08-15	0	2019-07-09 11:00:00	39.91
2017-07-01 11:33:00	37.8981	2019-08-16	0	2019-07-09 12:00:00	39.9154
2017-07-01 11:48:00	37.8981	2019-08-17	0	2019-07-09 13:00:00	39.9208
2017-07-01 12:03:00	37.8999	2019-08-18	0	2019-07-09 14:00:00	39.928
2017-07-01 12:18:00	37.8981	2019-08-19	0	2019-07-09 15:00:00	39.9352
2017-07-01 12:33:00	37.8981	2019-08-20	0	2019-07-09 16:00:00	39.9406
2017-07-01 12:48:00	37.8947	2019-08-21	0	2019-07-09 17:00:00	39.9496
2017-07-01 13:03:00	37.8964	2019-08-22	0	2019-07-09 18:00:00	39.9586
2017-07-01 13:18:00	37.8981	2019-08-23	0	2019-07-09 19:00:00	39.964
2017-07-01 13:33:00	37.8964	2019-08-24	0	2019-07-09 20:00:00	39.9729
2017-07-01 13:48:00	37.8999	2019-08-25	0	2019-07-09 21:00:00	39.9766
2017-07-01 14:03:00	37.8999	2019-08-26	0	2019-07-09 22:00:00	39.9767
2017-07-01 14:18:00	37.8999	2019-08-27	0	2019-07-09 23:00:00	39.9874
2017-07-01 14:33:00	37.8999	2019-08-28	1.52	2019-07-10	39.9946
2017-07-01 14:48:00	37.8999	2019-08-29	0	2019-07-10 01:00:00	39.9965
2017-07-01 15:03:00	37.8999	2019-08-30	0	2019-07-10 02:00:00	40.0054
2017-07-01 15:18:00	37.8981	2019-08-31	0	2019-07-10 03:00:00	40.0162
2017-07-01 15:33:00	37.8964	2019-09-01	0.51	2019-07-10 04:00:00	40.0234
2017-07-01 15:48:00	37.8964	2019-09-02	14.73	2019-07-10 05:00:00	40.027
2017-07-01 16:03:00	37.8999	2019-09-03	6.86	2019-07-10 06:00:00	40.0324
2017-07-01 16:18:00	37.8999	2019-09-04	0	2019-07-10 07:00:00	40.0449
2017-07-01 16:33:00	37.8999	2019-09-05	0	2019-07-10 08:00:00	40.0486
2017-07-01 16:48:00	37.8999	2019-09-06	5.33	2019-07-10 09:00:00	40.0487
2017-07-01 17:03:00	37.8999	2019-09-07	0	2019-07-10 10:00:00	40.0594
2017-07-01 17:18:00	37.8999	2019-09-08	11.18	2019-07-10 11:00:00	40.0631
2017-07-01 17:33:00	37.8999	2019-09-09	0	2019-07-10 12:00:00	40.0649
2017-07-01 17:48:00	37.8981	2019-09-10	0	2019-07-10 13:00:00	40.0757
2017-07-01 18:03:00	37.8999	2019-09-11	0	2019-07-10 14:00:00	40.0811
2017-07-01 18:18:00	37.8999	2019-09-12	0	2019-07-10 15:00:00	40.09
2017-07-01 18:33:00	37.8999	2019-09-13	0	2019-07-10 16:00:00	40.0901
2017-07-01 18:48:00	37.9016	2019-09-14	0	2019-07-10 17:00:00	40.0956
2017-07-01 19:03:00	37.9016	2019-09-15	0	2019-07-10 18:00:00	40.1045
2017-07-01 19:18:00	37.8999	2019-09-16	0	2019-07-10 19:00:00	40.1099
2017-07-01 19:33:00	37.8999	2019-09-17	0	2019-07-10 20:00:00	40.1189
2017-07-01 19:48:00	37.9016	2019-09-18	7.62	2019-07-10 21:00:00	40.119
2017-07-01 20:03:00	37.9016	2019-09-19	0	2019-07-10 22:00:00	40.1297
2017-07-01 20:18:00	37.9016	2019-09-20	0	2019-07-10 23:00:00	40.1369
2017-07-01 20:33:00	37.9016	2019-09-21	0	2019-07-11	40.1423
2017-07-01 20:48:00	37.9033	2019-09-22	0.25	2019-07-11 01:00:00	40.1495
2017-07-01 21:03:00	37.9016	2019-09-23	0	2019-07-11 02:00:00	40.1585
2017-07-01 21:18:00	37.9033	2019-09-24	0	2019-07-11 03:00:00	40.1621
2017-07-01 21:33:00	37.9033	2019-09-25	0	2019-07-11 04:00:00	40.1693
2017-07-01 21:48:00	37.8999	2019-09-26	0	2019-07-11 05:00:00	40.1765
2017-07-01 22:03:00	37.8999	2019-09-27	0	2019-07-11 06:00:00	40.1819
2017-07-01 22:18:00	37.9033	2019-09-28	0	2019-07-11 07:00:00	40.1891
2017-07-01 22:33:00	37.9016	2019-09-29	0	2019-07-11 08:00:00	40.1963
2017-07-01 22:48:00	37.8999	2019-09-30	0	2019-07-11 09:00:00	40.2035
2017-07-01 23:03:00	37.8999	2019-10-01	0	2019-07-11 10:00:00	40.2072
2017-07-01 23:18:00	37.8999	2019-10-02	32	2019-07-11 11:00:00	40.209
2017-07-01 23:33:00	37.8999	2019-10-03	2.29	2019-07-11 12:00:00	40.2144
2017-07-01 23:48:00	37.8999	2019-10-04	2.29	2019-07-11 13:00:00	40.2181
2017-07-02 00:03:00	37.9033	2019-10-05	12.7	2019-07-11 14:00:00	40.2288
2017-07-02 00:18:00	37.9033	2019-10-06	11.94	2019-07-11 15:00:00	40.2342
2017-07-02 00:33:00	37.9033	2019-10-07	0	2019-07-11 16:00:00	40.2432
2017-07-02 00:48:00	37.8999	2019-10-08	0	2019-07-11 17:00:00	40.2504
2017-07-02 01:03:00	37.8964	2019-10-09	0	2019-07-11 18:00:00	40.2558
2017-07-02 01:18:00	37.8999	2019-10-10	0	2019-07-11 19:00:00	40.2612
2017-07-02 01:33:00	37.8999	2019-10-11	0	2019-07-11 20:00:00	40.272
2017-07-02 01:48:00	37.8999	2019-10-12	0	2019-07-11 21:00:00	40.2774
2017-07-02 02:03:00	37.8999	2019-10-13	0	2019-07-11 22:00:00	40.2828
2017-07-02 02:18:00	37.8999	2019-10-14	0	2019-07-11 23:00:00	40.2882
2017-07-02 02:33:00	37.8999	2019-10-15	0	2019-07-12	40.2972
2017-07-02 02:48:00	37.8999	2019-10-16	0	2019-07-12 01:00:00	40.3026
2017-07-02 03:03:00	37.8999	2019-10-17	0	2019-07-12 02:00:00	40.308
2017-07-02 03:18:00	37.8981	2019-10-18	0	2019-07-12 03:00:00	40.3134
2017-07-02 03:33:00	37.9016	2019-10-19	0	2019-07-12 04:00:00	40.3189
2017-07-02 03:48:00	37.9016	2019-10-20	0	2019-07-12 05:00:00	40.3225
2017-07-02 04:03:00	37.8999	2019-10-21	0	2019-07-12 06:00:00	40.3261
2017-07-02 04:18:00	37.9016	2019-10-22	0	2019-07-12 07:00:00	40.3316
2017-07-02 04:33:00	37.8999	2019-10-23	0	2019-07-12 08:00:00	40.3405
2017-07-02 04:48:00	37.9016	2019-10-24	11.68	2019-07-12 09:00:00	40.3442
2017-07-02 05:03:00	37.9033	2019-10-25	0.25	2019-07-12 10:00:00	40.3514
2017-07-02 05:18:00	37.9033	2019-10-26	0	2019-07-12 11:00:00	40.3568
2017-07-02 05:33:00	37.9067	2019-10-27	0	2019-07-12 12:00:00	40.3657
2017-07-02 05:48:00	37.905	2019-10-28	0	2019-07-12 13:00:00	40.3729
2017-07-02 06:03:00	37.905	2019-10-29	0	2019-07-12 14:00:00	40.3766
2017-07-02 06:18:00	37.9033	2019-10-30	4.32	2019-07-12 15:00:00	40.3802
2017-07-02 06:33:00	37.905			2019-07-12 16:00:00	40.3839
2017-07-02 06:48:00	37.905			2019-07-12 17:00:00	40.3928
2017-07-02 07:03:00	37.905			2019-07-12 18:00:00	40.3982
2017-07-02 07:18:00	37.9067			2019-07-12 19:00:00	40.4001
2017-07-02 07:33:00	37.9033			2019-07-12 20:00:00	40.4109
2017-07-02 07:48:00	37.9067			2019-07-12 21:00:00	40.4163
2017-07-02 08:03:00	37.905			2019-07-12 22:00:00	40.4199
2017-07-02 08:18:00	37.9067			2019-07-12 23:00:00	40.4307
2017-07-02 08:33:00	37.9067			2019-07-13	40.4343
2017-07-02 08:48:00	37.9067			2019-07-13 01:00:00	40.4379
2017-07-02 09:03:00	37.9067			2019-07-13 02:00:00	40.4434
2017-07-02 09:18:00	37.905			2019-07-13 03:00:00	40.4505
2017-07-02 09:33:00	37.9067			2019-07-13 04:00:00	40.456
2017-07-02 09:48:00	37.9067			2019-07-13 05:00:00	40.4632
2017-07-02 10:03:00	37.9067			2019-07-13 06:00:00	40.4704
2017-07-02 10:18:00	37.9067			2019-07-13 07:00:00	40.4722
2017-07-02 10:33:00	37.9067			2019-07-13 08:00:00	40.483
2017-07-02 10:48:00	37.905			2019-07-13 09:00:00	40.4884
2017-07-02 11:03:00	37.9033			2019-07-13 10:00:00	40.4938
2017-07-02 11:18:00	37.905			2019-07-13 11:00:00	40.4939
2017-07-02 11:33:00	37.905			2019-07-13 12:00:00	40.5046
2017-07-02 11:48:00	37.905			2019-07-13 13:00:00	40.5065
2017-07-02 12:03:00	37.905			2019-07-13 14:00:00	40.5119
2017-07-02 12:18:00	37.905			2019-07-13 15:00:00	40.5209
2017-07-02 12:33:00	37.905			2019-07-13 16:00:00	40.5227
2017-07-02 12:48:00	37.905			2019-07-13 17:00:00	40.5335
2017-07-02 13:03:00	37.9067			2019-07-13 18:00:00	40.5389
2017-07-02 13:18:00	37.9033			2019-07-13 19:00:00	40.5479
2017-07-02 13:33:00	37.9033			2019-07-13 20:00:00	40.5551
2017-07-02 13:48:00	37.905			2019-07-13 21:00:00	40.5569
2017-07-02 14:03:00	37.9067			2019-07-13 22:00:00	40.5677
2017-07-02 14:18:00	37.9067			2019-07-13 23:00:00	40.5731
2017-07-02 14:33:00	37.905			2019-07-14	40.5785
2017-07-02 14:48:00	37.9033			2019-07-14 01:00:00	40.5839
2017-07-02 15:03:00	37.9067			2019-07-14 02:00:00	40.5876
2017-07-02 15:18:00	37.9033			2019-07-14 03:00:00	40.5948
2017-07-02 15:33:00	37.9033			2019-07-14 04:00:00	40.5984
2017-07-02 15:48:00	37.905			2019-07-14 05:00:00	40.6056
2017-07-02 16:03:00	37.9033			2019-07-14 06:00:00	40.6128
2017-07-02 16:18:00	37.905			2019-07-14 07:00:00	40.6164
2017-07-02 16:33:00	37.9067			2019-07-14 08:00:00	40.6236
2017-07-02 16:48:00	37.9033			2019-07-14 09:00:00	40.6273
2017-07-02 17:03:00	37.905			2019-07-14 10:00:00	40.6345
2017-07-02 17:18:00	37.905			2019-07-14 11:00:00	40.6399
2017-07-02 17:33:00	37.905			2019-07-14 12:00:00	40.6471
2017-07-02 17:48:00	37.905			2019-07-14 13:00:00	40.6543
2017-07-02 18:03:00	37.905			2019-07-14 14:00:00	40.6632
2017-07-02 18:18:00	37.9067			2019-07-14 15:00:00	40.6651
2017-07-02 18:33:00	37.9067			2019-07-14 16:00:00	40.667
2017-07-02 18:48:00	37.905			2019-07-14 17:00:00	40.6741
2017-07-02 19:03:00	37.9033			2019-07-14 18:00:00	40.6813
2017-07-02 19:18:00	37.905			2019-07-14 19:00:00	40.6868
2017-07-02 19:33:00	37.905			2019-07-14 20:00:00	40.694
2017-07-02 19:48:00	37.9067			2019-07-14 21:00:00	40.7011
2017-07-02 20:03:00	37.9085			2019-07-14 22:00:00	40.7083
2017-07-02 20:18:00	37.9067			2019-07-14 23:00:00	40.7138
2017-07-02 20:33:00	37.9067			2019-07-15	40.7192
2017-07-02 20:48:00	37.905			2019-07-15 01:00:00	40.7264
2017-07-02 21:03:00	37.905			2019-07-15 02:00:00	40.73
2017-07-02 21:18:00	37.905			2019-07-15 03:00:00	40.739
2017-07-02 21:33:00	37.9085			2019-07-15 04:00:00	40.7302
2017-07-02 21:48:00	37.9067			2019-07-15 05:00:00	38.7519
2017-07-02 22:03:00	37.9067			2019-07-15 06:00:00	39.2382
2017-07-02 22:18:00	37.9085			2019-07-15 07:00:00	39.6074
2017-07-02 22:33:00	37.9067			2019-07-15 08:00:00	39.8506
2017-07-02 22:48:00	37.9067			2019-07-15 09:00:00	40.0051
2017-07-02 23:03:00	37.9067			2019-07-15 10:00:00	40.1089
2017-07-02 23:18:00	37.905			2019-07-15 11:00:00	40.1899
2017-07-02 23:33:00	37.9085			2019-07-15 12:00:00	40.2517
2017-07-02 23:48:00	37.9067			2019-07-15 13:00:00	40.2906
2017-07-03 00:03:00	37.9033			2019-07-15 14:00:00	40.3366
2017-07-03 00:18:00	37.9085			2019-07-15 15:00:00	40.3649
2017-07-03 00:33:00	37.905			2019-07-15 16:00:00	40.395
2017-07-03 00:48:00	37.9067			2019-07-15 17:00:00	40.4216
2017-07-03 01:03:00	37.9085			2019-07-15 18:00:00	40.4394
2017-07-03 01:18:00	37.9085			2019-07-15 19:00:00	40.4572
2017-07-03 01:33:00	37.905			2019-07-15 20:00:00	40.4767
2017-07-03 01:48:00	37.9085			2019-07-15 21:00:00	40.4928
2017-07-03 02:03:00	37.905			2019-07-15 22:00:00	40.5017
2017-07-03 02:18:00	37.9067			2019-07-15 23:00:00	40.5142
2017-07-03 02:33:00	37.9033			2019-07-16	40.5267
2017-07-03 02:48:00	37.9033			2019-07-16 01:00:00	40.5392
2017-07-03 03:03:00	37.905			2019-07-16 02:00:00	40.5499
2017-07-03 03:18:00	37.9067			2019-07-16 03:00:00	40.5606
2017-07-03 03:33:00	37.9067			2019-07-16 04:00:00	40.5731
2017-07-03 03:48:00	37.905			2019-07-16 05:00:00	37.6109
2017-07-03 04:03:00	37.905			2019-07-16 06:00:00	37.7401
2017-07-03 04:18:00	37.9067			2019-07-16 07:00:00	38.4648
2017-07-03 04:33:00	37.9067			2019-07-16 08:00:00	36.9396
2017-07-03 04:48:00	37.9085			2019-07-16 09:00:00	37.45
2017-07-03 05:03:00	37.9067			2019-07-16 10:00:00	38.1273
2017-07-03 05:18:00	37.9067			2019-07-16 11:00:00	38.6271
2017-07-03 05:33:00	37.9067			2019-07-16 12:00:00	39.0026
2017-07-03 05:48:00	37.9067			2019-07-16 13:00:00	39.2847
2017-07-03 06:03:00	37.9067			2019-07-16 14:00:00	39.5036
2017-07-03 06:18:00	37.9067			2019-07-16 15:00:00	39.683
2017-07-03 06:33:00	37.9067			2019-07-16 16:00:00	39.8158
2017-07-03 06:48:00	37.905			2019-07-16 17:00:00	39.9191
2017-07-03 07:03:00	37.9085			2019-07-16 18:00:00	40.026
2017-07-03 07:18:00	37.9085			2019-07-16 19:00:00	40.0997
2017-07-03 07:33:00	37.9085			2019-07-16 20:00:00	40.1788
2017-07-03 07:48:00	37.9085			2019-07-16 21:00:00	40.2299
2017-07-03 08:03:00	37.9085			2019-07-16 22:00:00	40.2792
2017-07-03 08:18:00	37.9067			2019-07-16 23:00:00	40.3269
2017-07-03 08:33:00	37.9102			2019-07-17	40.3727
2017-07-03 08:48:00	37.9102			2019-07-17 01:00:00	40.4098
2017-07-03 09:03:00	37.9085			2019-07-17 02:00:00	40.4364
2017-07-03 09:18:00	37.9067			2019-07-17 03:00:00	40.4665
2017-07-03 09:33:00	37.9085			2019-07-17 04:00:00	40.4983
2017-07-03 09:48:00	37.9085			2019-07-17 05:00:00	40.5249
2017-07-03 10:03:00	37.9085			2019-07-17 06:00:00	40.5497
2017-07-03 10:18:00	37.9085			2019-07-17 07:00:00	40.571
2017-07-03 10:33:00	37.9067			2019-07-17 08:00:00	40.5905
2017-07-03 10:48:00	37.9085			2019-07-17 09:00:00	40.6118
2017-07-03 11:03:00	37.9102			2019-07-17 10:00:00	40.6314
2017-07-03 11:18:00	37.9102			2019-07-17 11:00:00	40.6527
2017-07-03 11:33:00	37.9085			2019-07-17 12:00:00	40.6687
2017-07-03 11:48:00	37.9085			2019-07-17 13:00:00	40.6865
2017-07-03 12:03:00	37.9085			2019-07-17 14:00:00	40.7007
2017-07-03 12:18:00	37.9085			2019-07-17 15:00:00	40.7097
2017-07-03 12:33:00	37.9067			2019-07-17 16:00:00	40.7239
2017-07-03 12:48:00	37.9085			2019-07-17 17:00:00	40.7382
2017-07-03 13:03:00	37.9067			2019-07-17 18:00:00	40.7506
2017-07-03 13:18:00	37.9067			2019-07-17 19:00:00	40.7684
2017-07-03 13:33:00	37.9085			2019-07-17 20:00:00	40.7756
2017-07-03 13:48:00	37.9067			2019-07-17 21:00:00	40.7899
2017-07-03 14:03:00	37.9085			2019-07-17 22:00:00	40.8006
2017-07-03 14:18:00	37.9067			2019-07-17 23:00:00	40.8096
2017-07-03 14:33:00	37.9067			2019-07-18	40.822
2017-07-03 14:48:00	37.9067			2019-07-18 01:00:00	40.831
2017-07-03 15:03:00	37.9067			2019-07-18 02:00:00	40.8399
2017-07-03 15:18:00	37.9067			2019-07-18 03:00:00	40.8489
2017-07-03 15:33:00	37.905			2019-07-18 04:00:00	40.8543
2017-07-03 15:48:00	37.905			2019-07-18 05:00:00	40.8721
2017-07-03 16:03:00	37.905			2019-07-18 06:00:00	40.8775
2017-07-03 16:18:00	37.905			2019-07-18 07:00:00	40.89
2017-07-03 16:33:00	37.9033			2019-07-18 08:00:00	40.9043
2017-07-03 16:48:00	37.905			2019-07-18 09:00:00	40.9079
2017-07-03 17:03:00	37.9067			2019-07-18 10:00:00	40.9134
2017-07-03 17:18:00	37.9067			2019-07-18 11:00:00	40.9223
2017-07-03 17:33:00	37.9033			2019-07-18 12:00:00	40.933
2017-07-03 17:48:00	37.905			2019-07-18 13:00:00	40.9367
2017-07-03 18:03:00	37.905			2019-07-18 14:00:00	40.9456
2017-07-03 18:18:00	37.9067			2019-07-18 15:00:00	40.9528
2017-07-03 18:33:00	37.9067			2019-07-18 16:00:00	40.9582
2017-07-03 18:48:00	37.905			2019-07-18 17:00:00	40.9654
2017-07-03 19:03:00	37.9067			2019-07-18 18:00:00	40.9726
2017-07-03 19:18:00	37.905			2019-07-18 19:00:00	40.9763
2017-07-03 19:33:00	37.9033			2019-07-18 20:00:00	40.9817
2017-07-03 19:48:00	37.905			2019-07-18 21:00:00	40.9995
2017-07-03 20:03:00	37.9033			2019-07-18 22:00:00	41.0049
2017-07-03 20:18:00	37.9033			2019-07-18 23:00:00	41.0156
2017-07-03 20:33:00	37.905			2019-07-19	41.021
2017-07-03 20:48:00	37.9033			2019-07-19 01:00:00	41.0229
2017-07-03 21:03:00	37.905			2019-07-19 02:00:00	41.0283
2017-07-03 21:18:00	37.9033			2019-07-19 03:00:00	41.0338
2017-07-03 21:33:00	37.905			2019-07-19 04:00:00	41.0427
2017-07-03 21:48:00	37.905			2019-07-19 05:00:00	41.0534
2017-07-03 22:03:00	37.9033			2019-07-19 06:00:00	41.0535
2017-07-03 22:18:00	37.9033			2019-07-19 07:00:00	41.0643
2017-07-03 22:33:00	37.905			2019-07-19 08:00:00	41.075
2017-07-03 22:48:00	37.905			2019-07-19 09:00:00	41.0786
2017-07-03 23:03:00	37.9067			2019-07-19 10:00:00	41.0876
2017-07-03 23:18:00	37.9067			2019-07-19 11:00:00	41.0859
2017-07-03 23:33:00	37.905			2019-07-19 12:00:00	41.0984
2017-07-03 23:48:00	37.905			2019-07-19 13:00:00	41.1003
2017-07-04 00:03:00	37.9033			2019-07-19 14:00:00	41.111
2017-07-04 00:18:00	37.905			2019-07-19 15:00:00	41.1165
2017-07-04 00:33:00	37.9016			2019-07-19 16:00:00	41.1219
2017-07-04 00:48:00	37.905			2019-07-19 17:00:00	41.1326
2017-07-04 01:03:00	37.8999			2019-07-19 18:00:00	41.138
2017-07-04 01:18:00	37.9033			2019-07-19 19:00:00	41.1417
2017-07-04 01:33:00	37.9016			2019-07-19 20:00:00	41.1489
2017-07-04 01:48:00	37.9033			2019-07-19 21:00:00	41.1525
2017-07-04 02:03:00	37.9033			2019-07-19 22:00:00	41.1579
2017-07-04 02:18:00	37.9033			2019-07-19 23:00:00	41.1633
2017-07-04 02:33:00	37.9033			2019-07-20	41.1723
2017-07-04 02:48:00	37.9033			2019-07-20 01:00:00	41.1742
2017-07-04 03:03:00	37.8999			2019-07-20 02:00:00	41.1831
2017-07-04 03:18:00	37.9033			2019-07-20 03:00:00	41.1921
2017-07-04 03:33:00	37.8999			2019-07-20 04:00:00	41.1922
2017-07-04 03:48:00	37.8999			2019-07-20 05:00:00	41.2029
2017-07-04 04:03:00	37.8981			2019-07-20 06:00:00	41.2101
2017-07-04 04:18:00	37.8999			2019-07-20 07:00:00	41.2208
2017-07-04 04:33:00	37.9016			2019-07-20 08:00:00	41.2192
2017-07-04 04:48:00	37.8981			2019-07-20 09:00:00	41.2228
2017-07-04 05:03:00	37.8999			2019-07-20 10:00:00	41.23
2017-07-04 05:18:00	37.8947			2019-07-20 11:00:00	41.2354
2017-07-04 05:33:00	37.8964			2019-07-20 12:00:00	41.2426
2017-07-04 05:48:00	37.8999			2019-07-20 13:00:00	41.2516
2017-07-04 06:03:00	37.8999			2019-07-20 14:00:00	41.2552
2017-07-04 06:18:00	37.8981			2019-07-20 15:00:00	41.2642
2017-07-04 06:33:00	37.8981			2019-07-20 16:00:00	41.2678
2017-07-04 06:48:00	37.8964			2019-07-20 17:00:00	41.2821
2017-07-04 07:03:00	37.8964			2019-07-20 18:00:00	41.284
2017-07-04 07:18:00	37.8981			2019-07-20 19:00:00	41.2894
2017-07-04 07:33:00	37.8999			2019-07-20 20:00:00	41.2966
2017-07-04 07:48:00	37.8999			2019-07-20 21:00:00	41.3091
2017-07-04 08:03:00	37.8999			2019-07-20 22:00:00	41.3145
2017-07-04 08:18:00	37.8999			2019-07-20 23:00:00	41.3234
2017-07-04 08:33:00	37.8999			2019-07-21	41.32
2017-07-04 08:48:00	37.8999			2019-07-21 01:00:00	41.3307
2017-07-04 09:03:00	37.8999			2019-07-21 02:00:00	41.3397
2017-07-04 09:18:00	37.9033			2019-07-21 03:00:00	41.3451
2017-07-04 09:33:00	37.8999			2019-07-21 04:00:00	41.3576
2017-07-04 09:48:00	37.8999			2019-07-21 05:00:00	41.3577
2017-07-04 10:03:00	37.8981			2019-07-21 06:00:00	41.3631
2017-07-04 10:18:00	37.8999			2019-07-21 07:00:00	41.3668
2017-07-04 10:33:00	37.8999			2019-07-21 08:00:00	41.3775
2017-07-04 10:48:00	37.8999			2019-07-21 09:00:00	41.3794
2017-07-04 11:03:00	37.8981			2019-07-21 10:00:00	41.3866
2017-07-04 11:18:00	37.8999			2019-07-21 11:00:00	41.3902
2017-07-04 11:33:00	37.8999			2019-07-21 12:00:00	41.3956
2017-07-04 11:48:00	37.8981			2019-07-21 13:00:00	41.4028
2017-07-04 12:03:00	37.8999			2019-07-21 14:00:00	41.4082
2017-07-04 12:18:00	37.8999			2019-07-21 15:00:00	41.4101
2017-07-04 12:33:00	37.8999			2019-07-21 16:00:00	41.4173
2017-07-04 12:48:00	37.8981			2019-07-21 17:00:00	41.4245
2017-07-04 13:03:00	37.8964			2019-07-21 18:00:00	41.4317
2017-07-04 13:18:00	37.8947			2019-07-21 19:00:00	41.4353
2017-07-04 13:33:00	37.8981			2019-07-21 20:00:00	41.4496
2017-07-04 13:48:00	37.8947			2019-07-21 21:00:00	41.4603
2017-07-04 14:03:00	37.893			2019-07-21 22:00:00	41.4604
2017-07-04 14:18:00	37.893			2019-07-21 23:00:00	41.4676
2017-07-04 14:33:00	37.893			2019-07-22	41.4713
2017-07-04 14:48:00	37.8913			2019-07-22 01:00:00	41.4838
2017-07-04 15:03:00	37.8913			2019-07-22 02:00:00	41.4856
2017-07-04 15:18:00	37.8913			2019-07-22 03:00:00	41.4946
2017-07-04 15:33:00	37.893			2019-07-22 04:00:00	41.4965
2017-07-04 15:48:00	37.893			2019-07-22 05:00:00	41.5072
2017-07-04 16:03:00	37.8913			2019-07-22 06:00:00	41.5144
2017-07-04 16:18:00	37.8913			2019-07-22 07:00:00	41.5216
2017-07-04 16:33:00	37.8895			2019-07-22 08:00:00	41.5323
2017-07-04 16:48:00	37.8895			2019-07-22 09:00:00	41.5377
2017-07-04 17:03:00	37.8878			2019-07-22 10:00:00	41.5467
2017-07-04 17:18:00	37.8913			2019-07-22 11:00:00	41.545
2017-07-04 17:33:00	37.8913			2019-07-22 12:00:00	41.5575	39.0431
2017-07-04 17:48:00	37.8895			2019-07-22 13:00:00	41.5559	39.1222
2017-07-04 18:03:00	37.8913			2019-07-22 14:00:00	41.5595	39.1838
2017-07-04 18:18:00	37.8913			2019-07-22 15:00:00	41.5614	39.1996
2017-07-04 18:33:00	37.8878			2019-07-22 16:00:00	41.5632	39.182
2017-07-04 18:48:00	37.8878			2019-07-22 17:00:00	41.5633	39.145
2017-07-04 19:03:00	37.8895			2019-07-22 18:00:00	41.5634	39.1011
2017-07-04 19:18:00	37.8913			2019-07-22 19:00:00	41.5653	39.0641
2017-07-04 19:33:00	37.8913			2019-07-22 20:00:00	41.5637	39.0413
2017-07-04 19:48:00	37.8913			2019-07-22 21:00:00	41.5673	39.0395
2017-07-04 20:03:00	37.8913			2019-07-22 22:00:00	41.5727	39.0466
2017-07-04 20:18:00	37.8913			2019-07-22 23:00:00	41.5622	39.0765
2017-07-04 20:33:00	37.8895			2019-07-23	41.5676	39.1151
2017-07-04 20:48:00	37.8913			2019-07-23 01:00:00	41.5659	39.1785
2017-07-04 21:03:00	37.8895			2019-07-23 02:00:00	41.5678	39.2683
2017-07-04 21:18:00	37.8913			2019-07-23 03:00:00	41.5644	39.3036
2017-07-04 21:33:00	37.8913			2019-07-23 04:00:00	41.5645	39.3001
2017-07-04 21:48:00	37.8913			2019-07-23 05:00:00	41.5628	39.2683
2017-07-04 22:03:00	37.893			2019-07-23 06:00:00	41.5576	39.2419
2017-07-04 22:18:00	37.8913			2019-07-23 07:00:00	41.5613	39.2137
2017-07-04 22:33:00	37.8913			2019-07-23 08:00:00	41.5596	39.1574
2017-07-04 22:48:00	37.893			2019-07-23 09:00:00	41.5544	39.1151
2017-07-04 23:03:00	37.893			2019-07-23 10:00:00	41.5704	39.1046
2017-07-04 23:18:00	37.893			2019-07-23 11:00:00	41.5635	39.1046
2017-07-04 23:33:00	37.8913			2019-07-23 12:00:00	41.5565	39.1362
2017-07-04 23:48:00	37.893			2019-07-23 13:00:00	41.5566	39.1926
2017-07-05 00:03:00	37.893			2019-07-23 14:00:00	41.5638	39.2648
2017-07-05 00:18:00	37.8913			2019-07-23 15:00:00	41.5657	39.3071
2017-07-05 00:33:00	37.8913			2019-07-23 16:00:00	41.5569	39.3036
2017-07-05 00:48:00	37.893			2019-07-23 17:00:00	41.5641	39.286
2017-07-05 01:03:00	37.8913			2019-07-23 18:00:00	41.5589	39.2454
2017-07-05 01:18:00	37.8913			2019-07-23 19:00:00	41.5643	39.175
2017-07-05 01:33:00	37.893			2019-07-23 20:00:00	41.5662	39.131
2017-07-05 01:48:00	37.893			2019-07-23 21:00:00	41.5716	39.1063
2017-07-05 02:03:00	37.8947			2019-07-23 22:00:00	41.5718	39.1028
2017-07-05 02:18:00	37.893			2019-07-23 23:00:00	41.5789	39.1292
2017-07-05 02:33:00	37.8913			2019-07-24	41.5808	39.175
2017-07-05 02:48:00	37.8913			2019-07-24 01:00:00	41.5792	39.249
2017-07-05 03:03:00	37.8913			2019-07-24 02:00:00	41.574	39.3195
2017-07-05 03:18:00	37.8913			2019-07-24 03:00:00	41.5759	39.3442
2017-07-05 03:33:00	37.893			2019-07-24 04:00:00	41.5813	39.3318
2017-07-05 03:48:00	37.8913			2019-07-24 05:00:00	41.5849	39.3212
2017-07-05 04:03:00	37.8913			2019-07-24 06:00:00	41.5868	39.3054
2017-07-05 04:18:00	37.893			2019-07-24 07:00:00	41.5763	39.2966
2017-07-05 04:33:00	37.8913			2019-07-24 08:00:00	41.58	39.2701
2017-07-05 04:48:00	37.8913			2019-07-24 09:00:00	41.5783	39.2243
2017-07-05 05:03:00	37.8913			2019-07-24 10:00:00	41.5802	39.1996
2017-07-05 05:18:00	37.8913			2019-07-24 11:00:00	41.5786	39.1803
2017-07-05 05:33:00	37.8913			2019-07-24 12:00:00	41.5787	39.1961
2017-07-05 05:48:00	37.893			2019-07-24 13:00:00	41.5823	39.2542
2017-07-05 06:03:00	37.893			2019-07-24 14:00:00	41.586	39.3124
2017-07-05 06:18:00	37.8895			2019-07-24 15:00:00	41.5826	39.3424
2017-07-05 06:33:00	37.893			2019-07-24 16:00:00	41.5827	39.3442
2017-07-05 06:48:00	37.8913			2019-07-24 17:00:00	41.581	39.3389
2017-07-05 07:03:00	37.8913			2019-07-24 18:00:00	41.5829	39.3265
2017-07-05 07:18:00	37.893			2019-07-24 19:00:00	41.5778	39.3001
2017-07-05 07:33:00	37.893			2019-07-24 20:00:00	41.5796	39.2595
2017-07-05 07:48:00	37.893			2019-07-24 21:00:00	41.5815	39.2225
2017-07-05 08:03:00	37.8913			2019-07-24 22:00:00	41.5816	39.1926
2017-07-05 08:18:00	37.8947			2019-07-24 23:00:00	41.5871	39.182
2017-07-05 08:33:00	37.893			2019-07-25	41.5784	39.2243
2017-07-05 08:48:00	37.893			2019-07-25 01:00:00	41.582	39.2948
2017-07-05 09:03:00	37.893			2019-07-25 02:00:00	41.5804	39.346
2017-07-05 09:18:00	37.893			2019-07-25 03:00:00	41.5805	39.3742
2017-07-05 09:33:00	37.8947			2019-07-25 04:00:00	41.5824	39.3636
2017-07-05 09:48:00	37.8947			2019-07-25 05:00:00	41.586	39.3424
2017-07-05 10:03:00	37.8947			2019-07-25 06:00:00	41.5862	39.3248
2017-07-05 10:18:00	37.8947			2019-07-25 07:00:00	41.5828	39.3248
2017-07-05 10:33:00	37.8947			2019-07-25 08:00:00	41.5882	39.3212
2017-07-05 10:48:00	37.8947			2019-07-25 09:00:00	41.583	39.3054
2017-07-05 11:03:00	37.8999			2019-07-25 10:00:00	41.5796	39.286
2017-07-05 11:18:00	37.8999			2019-07-25 11:00:00	41.5797	39.2701
2017-07-05 11:33:00	37.8964			2019-07-25 12:00:00	41.5799	39.2542
2017-07-05 11:48:00	37.8964			2019-07-25 13:00:00	41.5783	39.2807
2017-07-05 12:03:00	37.8947			2019-07-25 14:00:00	41.5731	39.3283
2017-07-05 12:18:00	37.8947			2019-07-25 15:00:00	41.5715	39.3618
2017-07-05 12:33:00	37.8981			2019-07-25 16:00:00	41.5716	39.3636
2017-07-05 12:48:00	37.8964			2019-07-25 17:00:00	41.5629	39.3565
2017-07-05 13:03:00	37.8999			2019-07-25 18:00:00	41.5666	39.3424
2017-07-05 13:18:00	37.8964			2019-07-25 19:00:00	41.5544	39.3424
2017-07-05 13:33:00	37.8981			2019-07-25 20:00:00	41.5492	39.3407
2017-07-05 13:48:00	37.8964			2019-07-25 21:00:00	41.5494	39.3265
2017-07-05 14:03:00	37.8947			2019-07-25 22:00:00	41.5477	39.3054
2017-07-05 14:18:00	37.8947			2019-07-25 23:00:00	41.5444	39.2966
2017-07-05 14:33:00	37.893			2019-07-26	41.5445	39.3248
2017-07-05 14:48:00	37.893			2019-07-26 01:00:00	41.5429	39.3477
2017-07-05 15:03:00	37.8964			2019-07-26 02:00:00	41.5395	39.3654
2017-07-05 15:18:00	37.893			2019-07-26 03:00:00	41.5361	39.3689
2017-07-05 15:33:00	37.893			2019-07-26 04:00:00	41.5415	39.3654
2017-07-05 15:48:00	37.893			2019-07-26 05:00:00	41.5364	39.3442
2017-07-05 16:03:00	37.8913			2019-07-26 06:00:00	41.533	39.3318
2017-07-05 16:18:00	37.8913			2019-07-26 07:00:00	41.5332	39.3248
2017-07-05 16:33:00	37.8913			2019-07-26 08:00:00	41.5368	39.3283
2017-07-05 16:48:00	37.8895			2019-07-26 09:00:00	41.5282	39.3336
2017-07-05 17:03:00	37.8895			2019-07-26 10:00:00	41.523	39.3336
2017-07-05 17:18:00	37.8895			2019-07-26 11:00:00	41.5197	39.3248
2017-07-05 17:33:00	37.8895			2019-07-26 12:00:00	41.5128	39.3142
2017-07-05 17:48:00	37.8895			2019-07-26 13:00:00	41.5147	39.3001
2017-07-05 18:03:00	37.8895			2019-07-26 14:00:00	41.5166	39.3089
2017-07-05 18:18:00	37.8895			2019-07-26 15:00:00	41.5185	39.3477
2017-07-05 18:33:00	37.8895			2019-07-26 16:00:00	41.5186	39.376
2017-07-05 18:48:00	37.8895			2019-07-26 17:00:00	41.5188	39.3813
2017-07-05 19:03:00	37.8895			2019-07-26 18:00:00	41.5031	39.3724
2017-07-05 19:18:00	37.8878			2019-07-26 19:00:00	41.4998	39.3636
2017-07-05 19:33:00	37.8895			2019-07-26 20:00:00	41.4981	39.3477
2017-07-05 19:48:00	37.8895			2019-07-26 21:00:00	41.4965	39.346
2017-07-05 20:03:00	37.8895			2019-07-26 22:00:00	41.4967	39.3548
2017-07-05 20:18:00	37.8913			2019-07-26 23:00:00	41.4933	39.3442
2017-07-05 20:33:00	37.8895			2019-07-27	41.4952	39.3389
2017-07-05 20:48:00	37.8913			2019-07-27 01:00:00	41.5007	39.3424
2017-07-05 21:03:00	37.8913			2019-07-27 02:00:00	41.4973	39.3618
2017-07-05 21:18:00	37.8895			2019-07-27 03:00:00	41.4922	39.3795
2017-07-05 21:33:00	37.8913			2019-07-27 04:00:00	41.4906	39.3936
2017-07-05 21:48:00	37.893			2019-07-27 05:00:00	41.4855	39.383
2017-07-05 22:03:00	37.893			2019-07-27 06:00:00	41.4786	39.3689
2017-07-05 22:18:00	37.893			2019-07-27 07:00:00	41.477	39.3477
2017-07-05 22:33:00	37.893			2019-07-27 08:00:00	41.4772	39.3407
2017-07-05 22:48:00	37.8913			2019-07-27 09:00:00	41.4773	39.3407
2017-07-05 23:03:00	37.893			2019-07-27 10:00:00	41.4792	39.3424
2017-07-05 23:18:00	37.893			2019-07-27 11:00:00	41.4706	39.3565
2017-07-05 23:33:00	37.8947			2019-07-27 12:00:00	41.4708	39.346
2017-07-05 23:48:00	37.893			2019-07-27 13:00:00	41.4674	39.3354
2017-07-06 00:03:00	37.893			2019-07-27 14:00:00	41.4764	39.3248
2017-07-06 00:18:00	37.893			2019-07-27 15:00:00	41.4713	39.3283
2017-07-06 00:33:00	37.893			2019-07-27 16:00:00	41.4697	39.3636
2017-07-06 00:48:00	37.893			2019-07-27 17:00:00	41.4733	39.3866
2017-07-06 01:03:00	37.893			2019-07-27 18:00:00	41.4753	39.3936
2017-07-06 01:18:00	37.8913			2019-07-27 19:00:00	41.4702	39.3724
2017-07-06 01:33:00	37.8913			2019-07-27 20:00:00	41.4703	39.3477
2017-07-06 01:48:00	37.8947			2019-07-27 21:00:00	41.4705	39.3248
2017-07-06 02:03:00	37.893			2019-07-27 22:00:00	41.4689	39.3054
2017-07-06 02:18:00	37.8913			2019-07-27 23:00:00	41.4656	39.2966
2017-07-06 02:33:00	37.893			2019-07-28	41.471	39.2913
2017-07-06 02:48:00	37.8947			2019-07-28 01:00:00	41.4676	39.2948
2017-07-06 03:03:00	37.8947			2019-07-28 02:00:00	41.4696	39.3036
2017-07-06 03:18:00	37.8895			2019-07-28 03:00:00	41.4662	39.3107
2017-07-06 03:33:00	37.8913			2019-07-28 04:00:00	41.4699	39.3195
2017-07-06 03:48:00	37.8913			2019-07-28 05:00:00	41.4718	39.3142
2017-07-06 04:03:00	37.893			2019-07-28 06:00:00	41.4667	39.3054
2017-07-06 04:18:00	37.893			2019-07-28 07:00:00	41.4704	39.2913
2017-07-06 04:33:00	37.893			2019-07-28 08:00:00	41.474	39.2842
2017-07-06 04:48:00	37.8895			2019-07-28 09:00:00	41.4672	39.2807
2017-07-06 05:03:00	37.8913			2019-07-28 10:00:00	41.4621	39.2842
2017-07-06 05:18:00	37.8895			2019-07-28 11:00:00	41.4623	39.2948
2017-07-06 05:33:00	37.8895			2019-07-28 12:00:00	41.4555	39.3177
2017-07-06 05:48:00	37.8913			2019-07-28 13:00:00	41.4592	39.3071
2017-07-06 06:03:00	37.8895			2019-07-28 14:00:00	41.4471	39.2877
2017-07-06 06:18:00	37.8913			2019-07-28 15:00:00	41.4525	39.2719
2017-07-06 06:33:00	37.8913			2019-07-28 16:00:00	41.4509	39.2913
2017-07-06 06:48:00	37.8913			2019-07-28 17:00:00	41.4476	39.3689
2017-07-06 07:03:00	37.893			2019-07-28 18:00:00	41.446	39.3813
2017-07-06 07:18:00	37.8895			2019-07-28 19:00:00	41.4445	39.3636
2017-07-06 07:33:00	37.8913			2019-07-28 20:00:00	41.4411	39.3336
2017-07-06 07:48:00	37.8913			2019-07-28 21:00:00	41.4413	39.3001
2017-07-06 08:03:00	37.893			2019-07-28 22:00:00	41.4397	39.286
2017-07-06 08:18:00	37.8913			2019-07-28 23:00:00	41.4364	39.2754
2017-07-06 08:33:00	37.8913			2019-07-29	41.4366	39.2807
2017-07-06 08:48:00	37.8913			2019-07-29 01:00:00	41.435	39.2877
2017-07-06 09:03:00	37.8913			2019-07-29 02:00:00	41.4335	39.3036
2017-07-06 09:18:00	37.893			2019-07-29 03:00:00	41.4319	39.3124
2017-07-06 09:33:00	37.893			2019-07-29 04:00:00	41.4338	39.3124
2017-07-06 09:48:00	37.8895			2019-07-29 05:00:00	41.434	39.2966
2017-07-06 10:03:00	37.8913			2019-07-29 06:00:00	41.4324	39.2772
2017-07-06 10:18:00	37.8947			2019-07-29 07:00:00	41.4344	39.2595
2017-07-06 10:33:00	37.8947			2019-07-29 08:00:00	41.4345	39.2384
2017-07-06 10:48:00	37.8947			2019-07-29 09:00:00	41.4382	39.226
2017-07-06 11:03:00	37.893			2019-07-29 10:00:00	41.4314	39.2243
2017-07-06 11:18:00	37.893			2019-07-29 11:00:00	41.4316	39.2208
2017-07-06 11:33:00	37.893			2019-07-29 12:00:00	41.4283	39.226
2017-07-06 11:48:00	37.8981			2019-07-29 13:00:00	41.4285	39.2278
2017-07-06 12:03:00	37.8964			2019-07-29 14:00:00	41.4286	39.2507
2017-07-06 12:18:00	37.893			2019-07-29 15:00:00	41.4306	39.256
2017-07-06 12:33:00	37.8947			2019-07-29 16:00:00	41.429	39.249
2017-07-06 12:48:00	37.8947			2019-07-29 17:00:00	41.4275	39.2578
2017-07-06 13:03:00	37.893			2019-07-29 18:00:00	41.4259	39.2719
2017-07-06 13:18:00	37.8947			2019-07-29 19:00:00	41.4278	39.2595
2017-07-06 13:33:00	37.893			2019-07-29 20:00:00	41.4245	39.2296
2017-07-06 13:48:00	37.8964			2019-07-29 21:00:00	41.4212	39.2031
2017-07-06 14:03:00	37.8913			2019-07-29 22:00:00	41.4197	39.1873
2017-07-06 14:18:00	37.893			2019-07-29 23:00:00	41.4233	39.1785
2017-07-06 14:33:00	37.8913			2019-07-30	41.4218	39.1838
2017-07-06 14:48:00	37.8964			2019-07-30 01:00:00	41.422	39.1996
2017-07-06 15:03:00	37.8947			2019-07-30 02:00:00	41.4204	39.2067
2017-07-06 15:18:00	37.893			2019-07-30 03:00:00	41.4206	39.1732
2017-07-06 15:33:00	37.8913			2019-07-30 04:00:00	41.4191	39.1468
2017-07-06 15:48:00	37.8895			2019-07-30 05:00:00	41.4175	39.1591
2017-07-06 16:03:00	37.8878			2019-07-30 06:00:00	41.416	39.2172
2017-07-06 16:18:00	37.8913			2019-07-30 07:00:00	41.4144	39.2666
2017-07-06 16:33:00	37.8913			2019-07-30 08:00:00	41.4163	39.2666
2017-07-06 16:48:00	37.8913			2019-07-30 09:00:00	41.4113	39.2472
2017-07-06 17:03:00	37.8895			2019-07-30 10:00:00	41.4132	39.2225
2017-07-06 17:18:00	37.8878			2019-07-30 11:00:00	41.4117	39.2137
2017-07-06 17:33:00	37.8878			2019-07-30 12:00:00	41.4084	39.2172
2017-07-06 17:48:00	37.8878			2019-07-30 13:00:00	41.4069	39.2102
2017-07-06 18:03:00	37.8861			2019-07-30 14:00:00	41.4053	39.1398
2017-07-06 18:18:00	37.8861			2019-07-30 15:00:00	41.402	39.0677
2017-07-06 18:33:00	37.8878			2019-07-30 16:00:00	41.3987	39.029
2017-07-06 18:48:00	37.8878			2019-07-30 17:00:00	41.3989	39.022
2017-07-06 19:03:00	37.8895			2019-07-30 18:00:00	41.3974	39.0641
2017-07-06 19:18:00	37.8861			2019-07-30 19:00:00	41.3959	39.1275
2017-07-06 19:33:00	37.8844			2019-07-30 20:00:00	41.3943	39.2454
2017-07-06 19:48:00	37.8895			2019-07-30 21:00:00	41.3945	39.3212
2017-07-06 20:03:00	37.8878			2019-07-30 22:00:00	41.3947	39.2842
2017-07-06 20:18:00	37.8861			2019-07-30 23:00:00	41.3914	39.256
2017-07-06 20:33:00	37.8861			2019-07-31	41.3951	39.249
2017-07-06 20:48:00	37.8878			2019-07-31 01:00:00	41.3918	39.2366
2017-07-06 21:03:00	37.8895			2019-07-31 02:00:00	41.3886	39.1785
2017-07-06 21:18:00	37.8895			2019-07-31 03:00:00	41.3853	39.1134
2017-07-06 21:33:00	37.8895			2019-07-31 04:00:00	41.3838	39.0817
2017-07-06 21:48:00	37.8895			2019-07-31 05:00:00	41.3874	39.0712
2017-07-06 22:03:00	37.8895			2019-07-31 06:00:00	41.3824	39.0817
2017-07-06 22:18:00	37.8913			2019-07-31 07:00:00	41.3826	39.131
2017-07-06 22:33:00	37.8895			2019-07-31 08:00:00	41.3811	39.1838
2017-07-06 22:48:00	37.8895			2019-07-31 09:00:00	41.3813	39.2666
2017-07-06 23:03:00	37.8913			2019-07-31 10:00:00	41.3815	39.3142
2017-07-06 23:18:00	37.8913			2019-07-31 11:00:00	41.3817	39.3054
2017-07-06 23:33:00	37.8913			2019-07-31 12:00:00	41.3854	39.286
2017-07-06 23:48:00	37.8895			2019-07-31 13:00:00	41.3856	39.226
2017-07-07 00:03:00	37.893			2019-07-31 14:00:00	41.3841	39.138
2017-07-07 00:18:00	37.8947			2019-07-31 15:00:00	41.3808	39.0817
2017-07-07 00:33:00	37.893			2019-07-31 16:00:00	41.3862	39.0273
2017-07-07 00:48:00	37.893			2019-07-31 17:00:00	41.3812	38.9904
2017-07-07 01:03:00	37.8913			2019-07-31 18:00:00	41.3745	38.9798
2017-07-07 01:18:00	37.8913			2019-07-31 19:00:00	41.3834	39.0308
2017-07-07 01:33:00	37.8947			2019-07-31 20:00:00	41.3801	39.1292
2017-07-07 01:48:00	37.8913			2019-07-31 21:00:00	41.3786	39.2137
2017-07-07 02:03:00	37.8895			2019-07-31 22:00:00	41.3805	39.3054
2017-07-07 02:18:00	37.8913			2019-07-31 23:00:00	41.3825	39.3636
2017-07-07 02:33:00	37.8913			2019-08-01	41.3879	39.3371
2017-07-07 02:48:00	37.8913			2019-08-01 01:00:00	41.3916	39.2842
2017-07-07 03:03:00	37.893			2019-08-01 02:00:00	41.3935	39.2067
2017-07-07 03:18:00	37.8913			2019-08-01 03:00:00	41.3937	39.1503
2017-07-07 03:33:00	37.8913			2019-08-01 04:00:00	41.3887	39.1046
2017-07-07 03:48:00	37.8913			2019-08-01 05:00:00	41.3907	39.0677
2017-07-07 04:03:00	37.8913			2019-08-01 06:00:00	41.3909	39.0431
2017-07-07 04:18:00	37.8895			2019-08-01 07:00:00	41.3911	39.0817
2017-07-07 04:33:00	37.8913			2019-08-01 08:00:00	41.3896	39.1398
2017-07-07 04:48:00	37.8913			2019-08-01 09:00:00	41.3881	39.1891
2017-07-07 05:03:00	37.8895			2019-08-01 10:00:00	41.3848	39.2296
2017-07-07 05:18:00	37.8913			2019-08-01 11:00:00	41.3902	39.2595
2017-07-07 05:33:00	37.8913			2019-08-01 12:00:00	41.3853	39.2701
2017-07-07 05:48:00	37.8861			2019-08-01 13:00:00	41.3872	39.2296
2017-07-07 06:03:00	37.8895			2019-08-01 14:00:00	41.3892	39.1803
2017-07-07 06:18:00	37.8878			2019-08-01 15:00:00	41.3911	39.1345
2017-07-07 06:33:00	37.8895			2019-08-01 16:00:00	41.3861	39.0782
2017-07-07 06:48:00	37.8895			2019-08-01 17:00:00	41.3846	39.0044
2017-07-07 07:03:00	37.8913			2019-08-01 18:00:00	41.3831	38.9693
2017-07-07 07:18:00	37.8913			2019-08-01 19:00:00	41.3799	38.9658
2017-07-07 07:33:00	37.8913			2019-08-01 20:00:00	41.3783	39.0677
2017-07-07 07:48:00	37.8878			2019-08-01 21:00:00	41.3786	39.1803
2017-07-07 08:03:00	37.8895			2019-08-01 22:00:00	41.3805	39.2683
2017-07-07 08:18:00	37.8878			2019-08-01 23:00:00	41.3842	39.3371
2017-07-07 08:33:00	37.8895			2019-08-02	41.3879	39.3707
2017-07-07 08:48:00	37.8895			2019-08-02 01:00:00	41.3881	39.3318
2017-07-07 09:03:00	37.8895			2019-08-02 02:00:00	41.39	39.2736
2017-07-07 09:18:00	37.8895			2019-08-02 03:00:00	41.3885	39.2172
2017-07-07 09:33:00	37.8913			2019-08-02 04:00:00	41.3922	39.1732
2017-07-07 09:48:00	37.8913			2019-08-02 05:00:00	41.389	39.1222
2017-07-07 10:03:00	37.8913			2019-08-02 06:00:00	41.3892	39.0817
2017-07-07 10:18:00	37.8895			2019-08-02 07:00:00	41.3877	39.0624
2017-07-07 10:33:00	37.8913			2019-08-02 08:00:00	41.3845	39.1028
2017-07-07 10:48:00	37.893			2019-08-02 09:00:00	41.3882	39.182
2017-07-07 11:03:00	37.893			2019-08-02 10:00:00	41.3849	39.2613
2017-07-07 11:18:00	37.8913			2019-08-02 11:00:00	41.3851	39.3036
2017-07-07 11:33:00	37.8913			2019-08-02 12:00:00	41.3923	39.3036
2017-07-07 11:48:00	37.893			2019-08-02 13:00:00	41.3891	39.2877
2017-07-07 12:03:00	37.8895			2019-08-02 14:00:00	41.3893	39.2507
2017-07-07 12:18:00	37.8895			2019-08-02 15:00:00	41.393	39.2031
2017-07-07 12:33:00	37.893			2019-08-02 16:00:00	41.4001	39.1591
2017-07-07 12:48:00	37.893			2019-08-02 17:00:00	41.3969	39.1187
2017-07-07 13:03:00	37.893			2019-08-02 18:00:00	41.3902	39.0782
2017-07-07 13:18:00	37.8913			2019-08-02 19:00:00	41.387	39.0343
2017-07-07 13:33:00	37.893			2019-08-02 20:00:00	41.3855	39.0606
2017-07-07 13:48:00	37.8895			2019-08-02 21:00:00	41.3857	39.1626
2017-07-07 14:03:00	37.8913			2019-08-02 22:00:00	41.3877	39.2595
2017-07-07 14:18:00	37.8895			2019-08-02 23:00:00	41.3862	39.3424
2017-07-07 14:33:00	37.8895			2019-08-03	41.3916	39.376
2017-07-07 14:48:00	37.8895			2019-08-03 01:00:00	41.3935	39.3742
2017-07-07 15:03:00	37.8895			2019-08-03 02:00:00	41.3955	39.3424
2017-07-07 15:18:00	37.8895			2019-08-03 03:00:00	41.3974	39.2877
2017-07-07 15:33:00	37.8895			2019-08-03 04:00:00	41.3977	39.2384
2017-07-07 15:48:00	37.8913			2019-08-03 05:00:00	41.3962	39.2031
2017-07-07 16:03:00	37.8861			2019-08-03 06:00:00	41.3912	39.1679
2017-07-07 16:18:00	37.8913			2019-08-03 07:00:00	41.3932	39.1398
2017-07-07 16:33:00	37.8895			2019-08-03 08:00:00	41.3917	39.1327
2017-07-07 16:48:00	37.8861			2019-08-03 09:00:00	41.3919	39.1697
2017-07-07 17:03:00	37.8861			2019-08-03 10:00:00	41.3887	39.2384
2017-07-07 17:18:00	37.8861			2019-08-03 11:00:00	41.3907	39.2877
2017-07-07 17:33:00	37.8878			2019-08-03 12:00:00	41.3909	39.3195
2017-07-07 17:48:00	37.8878			2019-08-03 13:00:00	41.3963	39.3265
2017-07-07 18:03:00	37.8878			2019-08-03 14:00:00	41.3948	39.3054
2017-07-07 18:18:00	37.8861			2019-08-03 15:00:00	41.3933	39.2613
2017-07-07 18:33:00	37.8861			2019-08-03 16:00:00	41.3953	39.2155
2017-07-07 18:48:00	37.8844			2019-08-03 17:00:00	41.3955	39.1767
2017-07-07 19:03:00	37.8861			2019-08-03 18:00:00	41.3923	39.131
2017-07-07 19:18:00	37.8861			2019-08-03 19:00:00	41.3995	39.0817
2017-07-07 19:33:00	37.8878			2019-08-03 20:00:00	41.3928	39.0466
2017-07-07 19:48:00	37.8844			2019-08-03 21:00:00	41.393	39.087
2017-07-07 20:03:00	37.8861			2019-08-03 22:00:00	41.395	39.1855
2017-07-07 20:18:00	37.8861			2019-08-03 23:00:00	41.3918	39.2842
2017-07-07 20:33:00	37.8861			2019-08-04	41.392	39.3477
2017-07-07 20:48:00	37.8844			2019-08-04 01:00:00	41.3906	39.3777
2017-07-07 21:03:00	37.8861			2019-08-04 02:00:00	41.3977	39.3742
2017-07-07 21:18:00	37.8844			2019-08-04 03:00:00	41.3962	39.3424
2017-07-07 21:33:00	37.8844			2019-08-04 04:00:00	41.3982	39.2877
2017-07-07 21:48:00	37.8878			2019-08-04 05:00:00	41.4019	39.2419
2017-07-07 22:03:00	37.8844			2019-08-04 06:00:00	41.3969	39.2049
2017-07-07 22:18:00	37.8878			2019-08-04 07:00:00	41.4006	39.1644
2017-07-07 22:33:00	37.8895			2019-08-04 08:00:00	41.3957	39.1187
2017-07-07 22:48:00	37.8861			2019-08-04 09:00:00	41.3994	39.1134
2017-07-07 23:03:00	37.8861			2019-08-04 10:00:00	41.3962	39.182
2017-07-07 23:18:00	37.8913			2019-08-04 11:00:00	41.3982	39.2578
2017-07-07 23:33:00	37.8861			2019-08-04 12:00:00	41.3967	39.3124
2017-07-07 23:48:00	37.8895			2019-08-04 13:00:00	41.3986	39.3424
2017-07-08 00:03:00	37.8913			2019-08-04 14:00:00	41.3972	39.3424
2017-07-08 00:18:00	37.893			2019-08-04 15:00:00	41.3957	39.3107
2017-07-08 00:33:00	37.8895			2019-08-04 16:00:00	41.3959	39.2595
2017-07-08 00:48:00	37.8895			2019-08-04 17:00:00	41.4014	39.2243
2017-07-08 01:03:00	37.8913			2019-08-04 18:00:00	41.4016	39.1803
2017-07-08 01:18:00	37.8913			2019-08-04 19:00:00	41.4001	39.1275
2017-07-08 01:33:00	37.893			2019-08-04 20:00:00	41.3969	39.0765
2017-07-08 01:48:00	37.893			2019-08-04 21:00:00	41.3989	39.0677
2017-07-08 02:03:00	37.8913			2019-08-04 22:00:00	41.3974	39.1433
2017-07-08 02:18:00	37.8895			2019-08-04 23:00:00	41.3959	39.2366
2017-07-08 02:33:00	37.893			2019-08-05	41.3979	39.3177
2017-07-08 02:48:00	37.893			2019-08-05 01:00:00	41.3964	39.376
2017-07-08 03:03:00	37.8895			2019-08-05 02:00:00	41.3984	39.4042
2017-07-08 03:18:00	37.8913			2019-08-05 03:00:00	41.4004	39.3883
2017-07-08 03:33:00	37.8913			2019-08-05 04:00:00	41.4024	39.353
2017-07-08 03:48:00	37.893			2019-08-05 05:00:00	41.4009	39.2966
2017-07-08 04:03:00	37.8878			2019-08-05 06:00:00	41.3994	39.2507
2017-07-08 04:18:00	37.893			2019-08-05 07:00:00	41.3997	39.2014
2017-07-08 04:33:00	37.8895			2019-08-05 08:00:00	41.3965	39.1398
2017-07-08 04:48:00	37.8895			2019-08-05 09:00:00	41.3985	39.0905
2017-07-08 05:03:00	37.8895			2019-08-05 10:00:00	41.397	39.1063
2017-07-08 05:18:00	37.8895			2019-08-05 11:00:00	41.399	39.1855
2017-07-08 05:33:00	37.8895			2019-08-05 12:00:00	41.3941	39.2613
2017-07-08 05:48:00	37.8895			2019-08-05 13:00:00	41.396	39.3142
2017-07-08 06:03:00	37.8878			2019-08-05 14:00:00	41.3929	39.353
2017-07-08 06:18:00	37.8878			2019-08-05 15:00:00	41.3948	39.346
2017-07-08 06:33:00	37.8895			2019-08-05 16:00:00	41.3968	39.3265
2017-07-08 06:48:00	37.8895			2019-08-05 17:00:00	41.3953	39.2842
2017-07-08 07:03:00	37.8878			2019-08-05 18:00:00	41.3956	39.2525
2017-07-08 07:18:00	37.8861			2019-08-05 19:00:00	41.3941	39.2014
2017-07-08 07:33:00	37.8913			2019-08-05 20:00:00	41.391	39.1362
2017-07-08 07:48:00	37.8861			2019-08-05 21:00:00	41.3878	39.08
2017-07-08 08:03:00	37.8895			2019-08-05 22:00:00	41.3846	39.0765
2017-07-08 08:18:00	37.8878			2019-08-05 23:00:00	41.3849	39.1644
2017-07-08 08:33:00	37.8878			2019-08-06	41.3834	39.2683
2017-07-08 08:48:00	37.8895			2019-08-06 01:00:00	41.3888	39.3477
2017-07-08 09:03:00	37.8861			2019-08-06 02:00:00	41.3891	39.3936
2017-07-08 09:18:00	37.8844			2019-08-06 03:00:00	41.3893	39.4131
2017-07-08 09:33:00	37.8895			2019-08-06 04:00:00	41.393	39.3989
2017-07-08 09:48:00	37.8895			2019-08-06 05:00:00	41.395	39.3601
2017-07-08 10:03:00	37.8913			2019-08-06 06:00:00	41.3936	39.3054
2017-07-08 10:18:00	37.8913			2019-08-06 07:00:00	41.3955	39.2648
2017-07-08 10:33:00	37.8895			2019-08-06 08:00:00	41.3889	39.2172
2017-07-08 10:48:00	37.8895			2019-08-06 09:00:00	41.3926	39.1626
2017-07-08 11:03:00	37.8913			2019-08-06 10:00:00	41.3912	39.1275
2017-07-08 11:18:00	37.8913			2019-08-06 11:00:00	41.388	39.1433
2017-07-08 11:33:00	37.893			2019-08-06 12:00:00	41.3865	39.2225
2017-07-08 11:48:00	37.893			2019-08-06 13:00:00	41.3834	39.3036
2017-07-08 12:03:00	37.893			2019-08-06 14:00:00	41.3905	39.3424
2017-07-08 12:18:00	37.893			2019-08-06 15:00:00	41.3873	39.3618
2017-07-08 12:33:00	37.893			2019-08-06 16:00:00	41.3893	39.3583
2017-07-08 12:48:00	37.893			2019-08-06 17:00:00	41.3879	39.3336
2017-07-08 13:03:00	37.893			2019-08-06 18:00:00	41.3916	39.3054
2017-07-08 13:18:00	37.8913			2019-08-06 19:00:00	41.385	39.2595
2017-07-08 13:33:00	37.8913			2019-08-06 20:00:00	41.387	39.212
2017-07-08 13:48:00	37.8895			2019-08-06 21:00:00	41.3855	39.1591
2017-07-08 14:03:00	37.893			2019-08-06 22:00:00	41.3841	39.1275
2017-07-08 14:18:00	37.8895			2019-08-06 23:00:00	41.386	39.1503
2017-07-08 14:33:00	37.8895			2019-08-07	41.3812	39.2208
2017-07-08 14:48:00	37.8913			2019-08-07 01:00:00	41.3832	39.3036
2017-07-08 15:03:00	37.8913			2019-08-07 02:00:00	41.3869	39.376
2017-07-08 15:18:00	37.893			2019-08-07 03:00:00	41.382	39.4148
2017-07-08 15:33:00	37.893			2019-08-07 04:00:00	41.3823	39.4325
2017-07-08 15:48:00	37.8913			2019-08-07 05:00:00	41.3825	39.4166
2017-07-08 16:03:00	37.8895			2019-08-07 06:00:00	41.3862	39.3777
2017-07-08 16:18:00	37.8895			2019-08-07 07:00:00	41.3848	39.3407
2017-07-08 16:33:00	37.8913			2019-08-07 08:00:00	41.3834	39.2948
2017-07-08 16:48:00	37.8861			2019-08-07 09:00:00	41.387	39.2542
2017-07-08 17:03:00	37.8878			2019-08-07 10:00:00	41.3839	39.2243
2017-07-08 17:18:00	37.8878			2019-08-07 11:00:00	41.3807	39.2225
2017-07-08 17:33:00	37.8861			2019-08-07 12:00:00	41.3776	39.2719
2017-07-08 17:48:00	37.8844			2019-08-07 13:00:00	41.3779	39.3336
2017-07-08 18:03:00	37.8861			2019-08-07 14:00:00	41.3747	39.3742
2017-07-08 18:18:00	37.8844			2019-08-07 15:00:00	41.375	39.4042
2017-07-08 18:33:00	37.8861			2019-08-07 16:00:00	41.3718	39.4078
2017-07-08 18:48:00	37.8844			2019-08-07 17:00:00	41.3755	39.4254
2017-07-08 19:03:00	37.8827			2019-08-07 18:00:00	41.3724	39.4325
2017-07-08 19:18:00	37.8861			2019-08-07 19:00:00	41.3675	39.4095
2017-07-08 19:33:00	37.8861			2019-08-07 20:00:00	41.3764	39.383
2017-07-08 19:48:00	37.8861			2019-08-07 21:00:00	41.3698	39.3689
2017-07-08 20:03:00	37.8861			2019-08-07 22:00:00	41.3701	39.3601
2017-07-08 20:18:00	37.8844			2019-08-07 23:00:00	41.3687	39.3424
2017-07-08 20:33:00	37.8861			2019-08-08	41.3655	39.3318
2017-07-08 20:48:00	37.8861			2019-08-08 01:00:00	41.3641	39.3477
2017-07-08 21:03:00	37.8878			2019-08-08 02:00:00	41.3661	39.3777
2017-07-08 21:18:00	37.8861			2019-08-08 03:00:00	41.3646	39.4095
2017-07-08 21:33:00	37.8861			2019-08-08 04:00:00	41.3615	39.4307
2017-07-08 21:48:00	37.8861			2019-08-08 05:00:00	41.3635	39.4272
2017-07-08 22:03:00	37.8861			2019-08-08 06:00:00	41.3621	39.4166
2017-07-08 22:18:00	37.8878			2019-08-08 07:00:00	41.3624	39.4025
2017-07-08 22:33:00	37.8878			2019-08-08 08:00:00	41.3592	39.3707
2017-07-08 22:48:00	37.8861			2019-08-08 09:00:00	41.3578	39.3424
2017-07-08 23:03:00	37.8878			2019-08-08 10:00:00	41.3598	39.3107
2017-07-08 23:18:00	37.8895			2019-08-08 11:00:00	41.3532	39.2877
2017-07-08 23:33:00	37.893			2019-08-08 12:00:00	41.3501	39.2701
2017-07-08 23:48:00	37.8895			2019-08-08 13:00:00	41.3538	39.2666
2017-07-09 00:03:00	37.8913			2019-08-08 14:00:00	41.3507	39.3054
2017-07-09 00:18:00	37.8913			2019-08-08 15:00:00	41.3492	39.3477
2017-07-09 00:33:00	37.8895			2019-08-08 16:00:00	41.3495	39.383
2017-07-09 00:48:00	37.8913			2019-08-08 17:00:00	41.3498	39.4131
2017-07-09 01:03:00	37.8895			2019-08-08 18:00:00	41.3484	39.4237
2017-07-09 01:18:00	37.8913			2019-08-08 19:00:00	41.3504	39.3972
2017-07-09 01:33:00	37.8913			2019-08-08 20:00:00	41.3524	39.3672
2017-07-09 01:48:00	37.8913			2019-08-08 21:00:00	41.351	39.3318
2017-07-09 02:03:00	37.893			2019-08-08 22:00:00	41.3479	39.3124
2017-07-09 02:18:00	37.893			2019-08-08 23:00:00	41.3413	39.293
2017-07-09 02:33:00	37.8913			2019-08-09	41.3399	39.2772
2017-07-09 02:48:00	37.8947			2019-08-09 01:00:00	41.3402	39.2772
2017-07-09 03:03:00	37.8913			2019-08-09 02:00:00	41.3405	39.3089
2017-07-09 03:18:00	37.8913			2019-08-09 03:00:00	41.3391	39.3424
2017-07-09 03:33:00	37.893			2019-08-09 04:00:00	41.3342	39.3813
2017-07-09 03:48:00	37.8913			2019-08-09 05:00:00	41.3414	39.406
2017-07-09 04:03:00	37.8895			2019-08-09 06:00:00	41.3365	39.4201
2017-07-09 04:18:00	37.893			2019-08-09 07:00:00	41.3368	39.4113
2017-07-09 04:33:00	37.8913			2019-08-09 08:00:00	41.3354	39.383
2017-07-09 04:48:00	37.893			2019-08-09 09:00:00	41.3357	39.3495
2017-07-09 05:03:00	37.8913			2019-08-09 10:00:00	41.336	39.3248
2017-07-09 05:18:00	37.8895			2019-08-09 11:00:00	41.3329	39.286
2017-07-09 05:33:00	37.8895			2019-08-09 12:00:00	41.3332	39.2472
2017-07-09 05:48:00	37.8895			2019-08-09 13:00:00	41.3301	39.226
2017-07-09 06:03:00	37.8895			2019-08-09 14:00:00	41.3252	39.2313
2017-07-09 06:18:00	37.8895			2019-08-09 15:00:00	41.3238	39.2648
2017-07-09 06:33:00	37.8913			2019-08-09 16:00:00	41.3241	39.3195
2017-07-09 06:48:00	37.8878			2019-08-09 17:00:00	41.321	39.3724
2017-07-09 07:03:00	37.8878			2019-08-09 18:00:00	41.3213	39.4095
2017-07-09 07:18:00	37.8913			2019-08-09 19:00:00	41.3233	39.4166
2017-07-09 07:33:00	37.8913			2019-08-09 20:00:00	41.3202	39.4131
2017-07-09 07:48:00	37.8895			2019-08-09 21:00:00	41.3171	39.3989
2017-07-09 08:03:00	37.8913			2019-08-09 22:00:00	41.3157	39.3618
2017-07-09 08:18:00	37.893			2019-08-09 23:00:00	41.3143	39.3265
2017-07-09 08:33:00	37.8895			2019-08-10	41.3112	39.2895
2017-07-09 08:48:00	37.8895			2019-08-10 01:00:00	41.3098	39.256
2017-07-09 09:03:00	37.8913			2019-08-10 02:00:00	41.3067	39.2525
2017-07-09 09:18:00	37.8895			2019-08-10 03:00:00	41.3019	39.2842
2017-07-09 09:33:00	37.8913			2019-08-10 04:00:00	41.3022	39.3354
2017-07-09 09:48:00	37.8913			2019-08-10 05:00:00	41.2991	39.3866
2017-07-09 10:03:00	37.8913			2019-08-10 06:00:00	41.296	39.4272
2017-07-09 10:18:00	37.8913			2019-08-10 07:00:00	41.2929	39.4431
2017-07-09 10:33:00	37.8895			2019-08-10 08:00:00	41.2966	39.4378
2017-07-09 10:48:00	37.8895			2019-08-10 09:00:00	41.2969	39.4219
2017-07-09 11:03:00	37.8913			2019-08-10 10:00:00	41.2921	39.3866
2017-07-09 11:18:00	37.8913			2019-08-10 11:00:00	41.289	39.3371
2017-07-09 11:33:00	37.8913			2019-08-10 12:00:00	41.2842	39.2842
2017-07-09 11:48:00	37.8913			2019-08-10 13:00:00	41.2845	39.2155
2017-07-09 12:03:00	37.8913			2019-08-10 14:00:00	41.278	39.1803
2017-07-09 12:18:00	37.893			2019-08-10 15:00:00	41.2801	39.175
2017-07-09 12:33:00	37.8913			2019-08-10 16:00:00	41.2736	39.2243
2017-07-09 12:48:00	37.8913			2019-08-10 17:00:00	41.2756	39.3054
2017-07-09 13:03:00	37.893			2019-08-10 18:00:00	41.2708	39.3919
2017-07-09 13:18:00	37.893			2019-08-10 19:00:00	41.2728	39.4378
2017-07-09 13:33:00	37.893			2019-08-10 20:00:00	41.2731	39.4643
2017-07-09 13:48:00	37.8913			2019-08-10 21:00:00	41.2717	39.459
2017-07-09 14:03:00	37.893			2019-08-10 22:00:00	41.2669	39.4396
2017-07-09 14:18:00	37.8913			2019-08-10 23:00:00	41.2689	39.4095
2017-07-09 14:33:00	37.8947			2019-08-11	41.2693	39.3724
2017-07-09 14:48:00	37.8913			2019-08-11 01:00:00	41.2662	39.3248
2017-07-09 15:03:00	37.893			2019-08-11 02:00:00	41.2631	39.2789
2017-07-09 15:18:00	37.893			2019-08-11 03:00:00	41.26	39.2507
2017-07-09 15:33:00	37.8964			2019-08-11 04:00:00	41.262	39.293
2017-07-09 15:48:00	37.8895			2019-08-11 05:00:00	41.2556	39.3513
2017-07-09 16:03:00	37.8895			2019-08-11 06:00:00	41.2542	39.3972
2017-07-09 16:18:00	37.8913			2019-08-11 07:00:00	41.2562	39.4343
2017-07-09 16:33:00	37.893			2019-08-11 08:00:00	41.2548	39.452
2017-07-09 16:48:00	37.8913			2019-08-11 09:00:00	41.2551	39.4537
2017-07-09 17:03:00	37.8895			2019-08-11 10:00:00	41.2538	39.4343
2017-07-09 17:18:00	37.8861			2019-08-11 11:00:00	41.249	39.3936
2017-07-09 17:33:00	37.8861			2019-08-11 12:00:00	41.2527	39.3424
2017-07-09 17:48:00	37.8861			2019-08-11 13:00:00	41.2496	39.2842
2017-07-09 18:03:00	37.8861			2019-08-11 14:00:00	41.2465	39.2225
2017-07-09 18:18:00	37.8827			2019-08-11 15:00:00	41.2469	39.175
2017-07-09 18:33:00	37.8861			2019-08-11 16:00:00	41.2404	39.1767
2017-07-09 18:48:00	37.8844			2019-08-11 17:00:00	41.2373	39.2366
2017-07-09 19:03:00	37.8844			2019-08-11 18:00:00	41.2377	39.346
2017-07-09 19:18:00	37.8878			2019-08-11 19:00:00	41.2397	39.4343
2017-07-09 19:33:00	37.8844			2019-08-11 20:00:00	41.24	39.4785
2017-07-09 19:48:00	37.8844			2019-08-11 21:00:00	41.2403	39.5068
2017-07-09 20:03:00	37.8844			2019-08-11 22:00:00	41.239	39.5015
2017-07-09 20:18:00	37.8844			2019-08-11 23:00:00	41.2393	39.4785
2017-07-09 20:33:00	37.8861			2019-08-12	41.2396	39.4466
2017-07-09 20:48:00	37.8878			2019-08-12 01:00:00	41.2349	39.406
2017-07-09 21:03:00	37.8861			2019-08-12 02:00:00	41.2335	39.3654
2017-07-09 21:18:00	37.8861			2019-08-12 03:00:00	41.2321	39.3265
2017-07-09 21:33:00	37.8861			2019-08-12 04:00:00	41.2324	39.2877
2017-07-09 21:48:00	37.8844			2019-08-12 05:00:00	41.2311	39.2948
2017-07-09 22:03:00	37.8844			2019-08-12 06:00:00	41.228	39.3583
2017-07-09 22:18:00	37.8844			2019-08-12 07:00:00	41.2284	39.4237
2017-07-09 22:33:00	37.8827			2019-08-12 08:00:00	41.2253	39.4714
2017-07-09 22:48:00	37.8861			2019-08-12 09:00:00	41.2256	39.4944
2017-07-09 23:03:00	37.8844			2019-08-12 10:00:00	41.226	39.5033
2017-07-09 23:18:00	37.8895			2019-08-12 11:00:00	41.228	39.4785
2017-07-09 23:33:00	37.8861			2019-08-12 12:00:00	41.2266	39.4343
2017-07-09 23:48:00	37.8861			2019-08-12 13:00:00	41.2253	39.3813
2017-07-10 00:03:00	37.8878			2019-08-12 14:00:00	41.2239	39.3212
2017-07-10 00:18:00	37.8895			2019-08-12 15:00:00	41.2208	39.2613
2017-07-10 00:33:00	37.8878			2019-08-12 16:00:00	41.2178	39.2137
2017-07-10 00:48:00	37.8895			2019-08-12 17:00:00	41.2164	39.2384
2017-07-10 01:03:00	37.8895			2019-08-12 18:00:00	41.2168	39.3689
2017-07-10 01:18:00	37.8895			2019-08-12 19:00:00	41.2137	39.452
2017-07-10 01:33:00	37.8895			2019-08-12 20:00:00	41.2141	39.5068
2017-07-10 01:48:00	37.8913			2019-08-12 21:00:00	41.2127	39.5422
2017-07-10 02:03:00	37.8913			2019-08-12 22:00:00	41.2113	39.5528
2017-07-10 02:18:00	37.8913			2019-08-12 23:00:00	41.2134	39.5404
2017-07-10 02:33:00	37.893			2019-08-13	41.2137	39.5121
2017-07-10 02:48:00	37.893			2019-08-13 01:00:00	41.2107	39.4767
2017-07-10 03:03:00	37.8913			2019-08-13 02:00:00	41.2093	39.4378
2017-07-10 03:18:00	37.8913			2019-08-13 03:00:00	41.2079	39.3919
2017-07-10 03:33:00	37.8913			2019-08-13 04:00:00	41.2083	39.3583
2017-07-10 03:48:00	37.8913			2019-08-13 05:00:00	41.2036	39.3407
2017-07-10 04:03:00	37.8913			2019-08-13 06:00:00	41.2039	39.3813
2017-07-10 04:18:00	37.8895			2019-08-13 07:00:00	41.2025	39.452
2017-07-10 04:33:00	37.8913			2019-08-13 08:00:00	41.1995	39.4944
2017-07-10 04:48:00	37.8895			2019-08-13 09:00:00	41.2015	39.5262
2017-07-10 05:03:00	37.893			2019-08-13 10:00:00	41.2019	39.5386
2017-07-10 05:18:00	37.8895			2019-08-13 11:00:00	41.1988	39.5351
2017-07-10 05:33:00	37.8895			2019-08-13 12:00:00	41.1992	39.5068
2017-07-10 05:48:00	37.8913			2019-08-13 13:00:00	41.1995	39.4608
2017-07-10 06:03:00	37.8861			2019-08-13 14:00:00	41.1931	39.406
2017-07-10 06:18:00	37.8895			2019-08-13 15:00:00	41.1951	39.3265
2017-07-10 06:33:00	37.8895			2019-08-13 16:00:00	41.1921	39.2366
2017-07-10 06:48:00	37.8861			2019-08-13 17:00:00	41.1891	39.2084
2017-07-10 07:03:00	37.8844			2019-08-13 18:00:00	41.1877	39.2401
2017-07-10 07:18:00	37.8895			2019-08-13 19:00:00	41.1898	39.3407
2017-07-10 07:33:00	37.8844			2019-08-13 20:00:00	41.1884	39.4431
2017-07-10 07:48:00	37.8861			2019-08-13 21:00:00	41.1837	39.5262
2017-07-10 08:03:00	37.8878			2019-08-13 22:00:00	41.1857	39.567
2017-07-10 08:18:00	37.8861			2019-08-13 23:00:00	41.1827	39.5758
2017-07-10 08:33:00	37.8878			2019-08-14	41.1864	39.5652
2017-07-10 08:48:00	37.8844			2019-08-14 01:00:00	41.1851	39.5262
2017-07-10 09:03:00	37.8861			2019-08-14 02:00:00	41.1854	39.4785
2017-07-10 09:18:00	37.8861			2019-08-14 03:00:00	41.1824	39.4307
2017-07-10 09:33:00	37.8861			2019-08-14 04:00:00	41.1828	39.3636
2017-07-10 09:48:00	37.8844			2019-08-14 05:00:00	41.1814	39.2966
2017-07-10 10:03:00	37.8844			2019-08-14 06:00:00	41.1784	39.263
2017-07-10 10:18:00	37.8861			2019-08-14 07:00:00	41.1737	39.3195
2017-07-10 10:33:00	37.8861			2019-08-14 08:00:00	41.174	39.4042
2017-07-10 10:48:00	37.8844			2019-08-14 09:00:00	41.1693	39.4785
2017-07-10 11:03:00	37.8844			2019-08-14 10:00:00	41.1731	39.5386
2017-07-10 11:18:00	37.8861			2019-08-14 11:00:00	41.1717	39.5599
2017-07-10 11:33:00	37.8861			2019-08-14 12:00:00	41.1704	39.5404
2017-07-10 11:48:00	37.8878			2019-08-14 13:00:00	41.1724	39.4891
2017-07-10 12:03:00	37.8861			2019-08-14 14:00:00	41.1694	39.4201
2017-07-10 12:18:00	37.8895			2019-08-14 15:00:00	41.1664	39.3195
2017-07-10 12:33:00	37.8895			2019-08-14 16:00:00	41.1634	39.2172
2017-07-10 12:48:00	37.8861			2019-08-14 17:00:00	41.1671	39.3124
2017-07-10 13:03:00	37.8861			2019-08-14 18:00:00	41.1624	39.3707
2017-07-10 13:18:00	37.8895			2019-08-14 19:00:00	41.1628	39.3936
2017-07-10 13:33:00	37.8913			2019-08-14 20:00:00	41.1631	39.4449
2017-07-10 13:48:00	37.8895			2019-08-14 21:00:00	41.1618	39.567
2017-07-10 14:03:00	37.8895			2019-08-14 22:00:00	41.1588	39.6396
2017-07-10 14:18:00	37.8913			2019-08-14 23:00:00	41.1625	39.6591
2017-07-10 14:33:00	37.8861			2019-08-15	41.1612	39.6521
2017-07-10 14:48:00	37.8895			2019-08-15 01:00:00	41.1599	39.6166
2017-07-10 15:03:00	37.8895			2019-08-15 02:00:00	41.1585	39.567
2017-07-10 15:18:00	37.8895			2019-08-15 03:00:00	41.1589	39.5227
2017-07-10 15:33:00	37.8895			2019-08-15 04:00:00	41.1576	39.4679
2017-07-10 15:48:00	37.8878			2019-08-15 05:00:00	41.1529	39.3936
2017-07-10 16:03:00	37.8861			2019-08-15 06:00:00	41.1532	39.3177
2017-07-10 16:18:00	37.8861			2019-08-15 07:00:00	41.1536	39.3036
2017-07-10 16:33:00	37.8895			2019-08-15 08:00:00	41.1523	39.3883
2017-07-10 16:48:00	37.8844			2019-08-15 09:00:00	41.1509	39.4714
2017-07-10 17:03:00	37.8844			2019-08-15 10:00:00	41.1513	39.5316
2017-07-10 17:18:00	37.8844			2019-08-15 11:00:00	41.1517	39.5581
2017-07-10 17:33:00	37.8878			2019-08-15 12:00:00	41.1504	39.5422
2017-07-10 17:48:00	37.8844			2019-08-15 13:00:00	41.1474	39.4979
2017-07-10 18:03:00	37.8844			2019-08-15 14:00:00	41.1477	39.4325
2017-07-10 18:18:00	37.8844			2019-08-15 15:00:00	41.1481	39.3336
2017-07-10 18:33:00	37.8844			2019-08-15 16:00:00	41.1417	39.2049
2017-07-10 18:48:00	37.8861			2019-08-15 17:00:00	41.1438	39.1503
2017-07-10 19:03:00	37.8861			2019-08-15 18:00:00	41.1425	39.1609
2017-07-10 19:18:00	37.8827			2019-08-15 19:00:00	41.1395	39.1855
2017-07-10 19:33:00	37.8844			2019-08-15 20:00:00	41.1398	39.2243
2017-07-10 19:48:00	37.8827			2019-08-15 21:00:00	41.1436	39.353
2017-07-10 20:03:00	37.8861			2019-08-15 22:00:00	41.1372	39.4979
2017-07-10 20:18:00	37.8827			2019-08-15 23:00:00	41.1409	39.5705
2017-07-10 20:33:00	37.8827			2019-08-16	41.1396	39.5936
2017-07-10 20:48:00	37.8827			2019-08-16 01:00:00	41.14	39.5758
2017-07-10 21:03:00	37.8827			2019-08-16 02:00:00	41.1387	39.5316
2017-07-10 21:18:00	37.8861			2019-08-16 03:00:00	41.1357	39.4679
2017-07-10 21:33:00	37.8827			2019-08-16 04:00:00	41.1344	39.3777
2017-07-10 21:48:00	37.8827			2019-08-16 05:00:00	41.1347	39.2419
2017-07-10 22:03:00	37.8844			2019-08-16 06:00:00	41.1317	39.145
2017-07-10 22:18:00	37.8827			2019-08-16 07:00:00	41.1355	39.1222
2017-07-10 22:33:00	37.8844			2019-08-16 08:00:00	41.1325	39.1609
2017-07-10 22:48:00	37.8844			2019-08-16 09:00:00	41.1295	39.2595
2017-07-10 23:03:00	37.8844			2019-08-16 10:00:00	41.1299	39.4095
2017-07-10 23:18:00	37.8844			2019-08-16 11:00:00	41.1303	39.4944
2017-07-10 23:33:00	37.8844			2019-08-16 12:00:00	41.1323	39.5209
2017-07-10 23:48:00	37.8827			2019-08-16 13:00:00	41.1293	39.5015
2017-07-11 00:03:00	37.8844			2019-08-16 14:00:00	41.1263	39.4396
2017-07-11 00:18:00	37.8844			2019-08-16 15:00:00	41.1267	39.3318
2017-07-11 00:33:00	37.8844			2019-08-16 16:00:00	41.1221	39.2084
2017-07-11 00:48:00	37.8861			2019-08-16 17:00:00	41.1275	39.1767
2017-07-11 01:03:00	37.8861			2019-08-16 18:00:00	41.1245	39.2067
2017-07-11 01:18:00	37.8861			2019-08-16 19:00:00	41.1232	39.2366
2017-07-11 01:33:00	37.8913			2019-08-16 20:00:00	41.1236	39.256
2017-07-11 01:48:00	37.8895			2019-08-16 21:00:00	41.1206	39.2525
2017-07-11 02:03:00	37.8878			2019-08-16 22:00:00	41.1176	39.3371
2017-07-11 02:18:00	37.8878			2019-08-16 23:00:00	41.123	39.4767
2017-07-11 02:33:00	37.8895			2019-08-17	41.1184	39.5546
2017-07-11 02:48:00	37.8895			2019-08-17 01:00:00	41.1187	39.5688
2017-07-11 03:03:00	37.8913			2019-08-17 02:00:00	41.1191	39.5369
2017-07-11 03:18:00	37.8913			2019-08-17 03:00:00	41.1195	39.4661
2017-07-11 03:33:00	37.8895			2019-08-17 04:00:00	41.1182	39.3407
2017-07-11 03:48:00	37.8913			2019-08-17 05:00:00	41.1152	39.2049
2017-07-11 04:03:00	37.8895			2019-08-17 06:00:00	41.1173	39.1468
2017-07-11 04:18:00	37.8895			2019-08-17 07:00:00	41.1143	39.1626
2017-07-11 04:33:00	37.8895			2019-08-17 08:00:00	41.118	39.182
2017-07-11 04:48:00	37.8913			2019-08-17 09:00:00	41.1134	39.2031
2017-07-11 05:03:00	37.8913			2019-08-17 10:00:00	41.1121	39.293
2017-07-11 05:18:00	37.8895			2019-08-17 11:00:00	41.1159	39.4219
2017-07-11 05:33:00	37.8878			2019-08-17 12:00:00	41.1146	39.5121
2017-07-11 05:48:00	37.8895			2019-08-17 13:00:00	41.1133	39.5316
2017-07-11 06:03:00	37.8895			2019-08-17 14:00:00	41.1136	39.5068
2017-07-11 06:18:00	37.8913			2019-08-17 15:00:00	41.1157	39.4325
2017-07-11 06:33:00	37.8844			2019-08-17 16:00:00	41.1127	39.2913
2017-07-11 06:48:00	37.8895			2019-08-17 17:00:00	41.1114	39.2137
2017-07-11 07:03:00	37.8895			2019-08-17 18:00:00	41.1118	39.2278
2017-07-11 07:18:00	37.8861			2019-08-17 19:00:00	41.1055	39.2578
2017-07-11 07:33:00	37.8861			2019-08-17 20:00:00	41.1076	39.2807
2017-07-11 07:48:00	37.8861			2019-08-17 21:00:00	41.108	39.2913
2017-07-11 08:03:00	37.8844			2019-08-17 22:00:00	41.11	39.2895
2017-07-11 08:18:00	37.8878			2019-08-17 23:00:00	41.1104	39.383
2017-07-11 08:33:00	37.8861			2019-08-18	41.1108	39.5033
2017-07-11 08:48:00	37.8844			2019-08-18 01:00:00	41.1095	39.5599
2017-07-11 09:03:00	37.8861			2019-08-18 02:00:00	41.1116	39.5599
2017-07-11 09:18:00	37.8827			2019-08-18 03:00:00	41.107	39.5068
2017-07-11 09:33:00	37.8861			2019-08-18 04:00:00	41.1073	39.4042
2017-07-11 09:48:00	37.8844			2019-08-18 05:00:00	41.1044	39.2648
2017-07-11 10:03:00	37.8861			2019-08-18 06:00:00	41.0998	39.1873
2017-07-11 10:18:00	37.8861			2019-08-18 07:00:00	41.1035	39.2067
2017-07-11 10:33:00	37.8844			2019-08-18 08:00:00	41.1022	39.2349
2017-07-11 10:48:00	37.8844			2019-08-18 09:00:00	41.1009	39.2578
2017-07-11 11:03:00	37.8827			2019-08-18 10:00:00	41.1013	39.2666
2017-07-11 11:18:00	37.8844			2019-08-18 11:00:00	41.1017	39.3265
2017-07-11 11:33:00	37.8861			2019-08-18 12:00:00	41.1004	39.4449
2017-07-11 11:48:00	37.8844			2019-08-18 13:00:00	41.0992	39.5262
2017-07-11 12:03:00	37.8844			2019-08-18 14:00:00	41.1029	39.5298
2017-07-11 12:18:00	37.8878			2019-08-18 15:00:00	41.1033	39.4608
2017-07-11 12:33:00	37.8878			2019-08-18 16:00:00	41.0987	39.3389
2017-07-11 12:48:00	37.8878			2019-08-18 17:00:00	41.0991	39.256
2017-07-11 13:03:00	37.8878			2019-08-18 18:00:00	41.0978	39.2613
2017-07-11 13:18:00	37.8861			2019-08-18 19:00:00	41.0965	39.2895
2017-07-11 13:33:00	37.8878			2019-08-18 20:00:00	41.0969	39.3142
2017-07-11 13:48:00	37.8861			2019-08-18 21:00:00	41.0973	39.3301
2017-07-11 14:03:00	37.8861			2019-08-18 22:00:00	41.0944	39.3248
2017-07-11 14:18:00	37.8878			2019-08-18 23:00:00	41.0897	39.3618
2017-07-11 14:33:00	37.8895			2019-08-19	41.0901	39.4891
2017-07-11 14:48:00	37.8895			2019-08-19 01:00:00	41.0889	39.5758
2017-07-11 15:03:00	37.8895			2019-08-19 02:00:00	41.0926	39.5971
2017-07-11 15:18:00	37.8913			2019-08-19 03:00:00	41.093	39.5776
2017-07-11 15:33:00	37.8878			2019-08-19 04:00:00	41.0901	39.5174
2017-07-11 15:48:00	37.8878			2019-08-19 05:00:00	41.0905	39.406
2017-07-11 16:03:00	37.8895			2019-08-19 06:00:00	41.0942	39.2736
2017-07-11 16:18:00	37.8913			2019-08-19 07:00:00	41.0896	39.212
2017-07-11 16:33:00	37.8878			2019-08-19 08:00:00	41.0917	39.2225
2017-07-11 16:48:00	37.8844			2019-08-19 09:00:00	41.0887	39.2454
2017-07-11 17:03:00	37.8827			2019-08-19 10:00:00	41.0875	39.2719
2017-07-11 17:18:00	37.8878			2019-08-19 11:00:00	41.0862	39.3636
2017-07-11 17:33:00	37.8844			2019-08-19 12:00:00	41.0866	39.4909
2017-07-11 17:48:00	37.8844			2019-08-19 13:00:00	41.087	39.5528
2017-07-11 18:03:00	37.8861			2019-08-19 14:00:00	41.0874	39.5794
2017-07-11 18:18:00	37.8844			2019-08-19 15:00:00	41.0861	39.551
2017-07-11 18:33:00	37.8861			2019-08-19 16:00:00	41.0832	39.4626
2017-07-11 18:48:00	37.8844			2019-08-19 17:00:00	41.0836	39.3583
2017-07-11 19:03:00	37.8844			2019-08-19 18:00:00	41.0807	39.2842
2017-07-11 19:18:00	37.8861			2019-08-19 19:00:00	41.0794	39.2666
2017-07-11 19:33:00	37.8827			2019-08-19 20:00:00	41.0781	39.2948
2017-07-11 19:48:00	37.8844			2019-08-19 21:00:00	41.0819	39.3142
2017-07-11 20:03:00	37.8844			2019-08-19 22:00:00	41.0773	39.323
2017-07-11 20:18:00	37.8827			2019-08-19 23:00:00	41.0777	39.3424
2017-07-11 20:33:00	37.8809			2019-08-20	41.0748	39.452
2017-07-11 20:48:00	37.8844			2019-08-20 01:00:00	41.0685	39.5546
2017-07-11 21:03:00	37.8827			2019-08-20 02:00:00	41.0706	39.5989
2017-07-11 21:18:00	37.8827			2019-08-20 03:00:00	41.0727	39.5953
2017-07-11 21:33:00	37.8827			2019-08-20 04:00:00	41.0714	39.5581
2017-07-11 21:48:00	37.8809			2019-08-20 05:00:00	41.0735	39.4466
2017-07-11 22:03:00	37.8827			2019-08-20 06:00:00	41.0705	39.2983
2017-07-11 22:18:00	37.8827			2019-08-20 07:00:00	41.0693	39.2243
2017-07-11 22:33:00	37.8844			2019-08-20 08:00:00	41.068	39.2454
2017-07-11 22:48:00	37.8844			2019-08-20 09:00:00	41.0668	39.2807
2017-07-11 23:03:00	37.8827			2019-08-20 10:00:00	41.0672	39.2983
2017-07-11 23:18:00	37.8844			2019-08-20 11:00:00	41.0659	39.3124
2017-07-11 23:33:00	37.8861			2019-08-20 12:00:00	41.0713	39.3813
2017-07-11 23:48:00	37.8844			2019-08-20 13:00:00	41.0718	39.4926
2017-07-12 00:03:00	37.8861			2019-08-20 14:00:00	41.0688	39.5688
2017-07-12 00:18:00	37.8861			2019-08-20 15:00:00	41.0743	39.567
2017-07-12 00:33:00	37.8844			2019-08-20 16:00:00	41.0713	39.5174
2017-07-12 00:48:00	37.8844			2019-08-20 17:00:00	41.0701	39.4042
2017-07-12 01:03:00	37.8844			2019-08-20 18:00:00	41.0738	39.316
2017-07-12 01:18:00	37.8844			2019-08-20 19:00:00	41.0709	39.2877
2017-07-12 01:33:00	37.8844			2019-08-20 20:00:00	41.073	39.3071
2017-07-12 01:48:00	37.8861			2019-08-20 21:00:00	41.0701	39.3283
2017-07-12 02:03:00	37.8878			2019-08-20 22:00:00	41.0722	39.3318
2017-07-12 02:18:00	37.8895			2019-08-20 23:00:00	41.0743	39.3813
2017-07-12 02:33:00	37.8895			2019-08-21	41.0697	39.5033
2017-07-12 02:48:00	37.8913			2019-08-21 01:00:00	41.0717	39.6095
2017-07-12 03:03:00	37.8878			2019-08-21 02:00:00	41.0738	39.6574
2017-07-12 03:18:00	37.8895			2019-08-21 03:00:00	41.0693	39.6645
2017-07-12 03:33:00	37.8913			2019-08-21 04:00:00	41.0697	39.6343
2017-07-12 03:48:00	37.8913			2019-08-21 05:00:00	41.0701	39.5723
2017-07-12 04:03:00	37.8913			2019-08-21 06:00:00	41.0688	39.4679
2017-07-12 04:18:00	37.8913			2019-08-21 07:00:00	41.0709	39.3248
2017-07-12 04:33:00	37.8913			2019-08-21 08:00:00	41.073	39.2296
2017-07-12 04:48:00	37.893			2019-08-21 09:00:00	41.0718	39.2454
2017-07-12 05:03:00	37.8913			2019-08-21 10:00:00	41.0722	39.2772
2017-07-12 05:18:00	37.8913			2019-08-21 11:00:00	41.0709	39.2983
2017-07-12 05:33:00	37.8913			2019-08-21 12:00:00	41.073	39.3124
2017-07-12 05:48:00	37.8913			2019-08-21 13:00:00	41.0751	39.3672
2017-07-12 06:03:00	37.8895			2019-08-21 14:00:00	41.0739	39.4449
2017-07-12 06:18:00	37.8913			2019-08-21 15:00:00	41.076	39.482
2017-07-12 06:33:00	37.8913			2019-08-21 16:00:00	41.078	39.4449
2017-07-12 06:48:00	37.8895			2019-08-21 17:00:00	41.0751	39.3689
2017-07-12 07:03:00	37.8895			2019-08-21 18:00:00	41.0806	39.3124
2017-07-12 07:18:00	37.8895			2019-08-21 19:00:00	41.0777	39.3124
2017-07-12 07:33:00	37.8861			2019-08-21 20:00:00	41.0797	39.3407
2017-07-12 07:48:00	37.8878			2019-08-21 21:00:00	41.0768	39.3636
2017-07-12 08:03:00	37.8844			2019-08-21 22:00:00	41.0789	39.3813
2017-07-12 08:18:00	37.8878			2019-08-21 23:00:00	41.0827	39.3919
2017-07-12 08:33:00	37.8878			2019-08-22	41.0831	39.3866
2017-07-12 08:48:00	37.8861			2019-08-22 01:00:00	41.0819	39.376
2017-07-12 09:03:00	37.8861			2019-08-22 02:00:00	41.0823	39.4148
2017-07-12 09:18:00	37.8861			2019-08-22 03:00:00	41.086	39.4449
2017-07-12 09:33:00	37.8861			2019-08-22 04:00:00	41.0865	39.4573
				2019-08-22 05:00:00	41.0852	39.4007
				2019-08-22 06:00:00	41.0873	39.3177
				2019-08-22 07:00:00	41.0911	39.3036
				2019-08-22 08:00:00	41.0882	39.323
				2019-08-22 09:00:00	41.0919	39.3477
				2019-08-22 10:00:00	41.0907	39.376
				2019-08-22 11:00:00	41.0895	39.3936
				2019-08-22 12:00:00	41.0832	39.4078
				2019-08-22 13:00:00	41.092	39.406
				2019-08-22 14:00:00	41.0907	39.3972
				2019-08-22 15:00:00	41.0912	39.4078
				2019-08-22 16:00:00	41.0899	39.4201
				2019-08-22 17:00:00	41.0937	39.4201
				2019-08-22 18:00:00	41.0941	39.3936
				2019-08-22 19:00:00	41.0912	39.3672
				2019-08-22 20:00:00	41.0933	39.376
				2019-08-22 21:00:00	41.0904	39.3936
				2019-08-22 22:00:00	41.0892	39.4095
				2019-08-22 23:00:00	41.088	39.4201
				2019-08-23	41.0901	39.4201
				2019-08-23 01:00:00	41.0905	39.4148
2017-07-12 15:03:00	37.8866			2019-08-23 02:00:00	41.0926	39.3936
2017-07-12 15:18:00	37.8779			2019-08-23 03:00:00	41.0947	39.3936
2017-07-12 15:33:00	37.8935			2019-08-23 04:00:00	41.0918	39.4025
2017-07-12 15:48:00	37.9125			2019-08-23 05:00:00	41.0922	39.3883
2017-07-12 16:03:00	37.9332			2019-08-23 06:00:00	41.0877	39.3548
2017-07-12 16:18:00	37.9505			2019-08-23 07:00:00	41.0898	39.3424
2017-07-12 16:33:00	37.9661			2019-08-23 08:00:00	41.0902	39.3583
2017-07-12 16:48:00	37.9816			2019-08-23 09:00:00	41.0857	39.3795
2017-07-12 17:03:00	37.9954			2019-08-23 10:00:00	41.0894	39.4042
2017-07-12 17:18:00	38.0076			2019-08-23 11:00:00	41.0866	39.429
2017-07-12 17:33:00	38.0197			2019-08-23 12:00:00	41.0853	39.4413
2017-07-12 17:48:00	38.0301			2019-08-23 13:00:00	41.0824	39.4466
2017-07-12 18:03:00	38.0404			2019-08-23 14:00:00	41.0829	39.4431
2017-07-12 18:18:00	38.0491			2019-08-23 15:00:00	41.0833	39.4307
2017-07-12 18:33:00	38.0595			2019-08-23 16:00:00	41.0804	39.4272
2017-07-12 18:48:00	38.0664			2019-08-23 17:00:00	41.0809	39.4184
2017-07-12 19:03:00	38.0768			2019-08-23 18:00:00	41.078	39.4201
2017-07-12 19:18:00	38.0837			2019-08-23 19:00:00	41.0818	39.4042
2017-07-12 19:33:00	38.0941			2019-08-23 20:00:00	41.0772	39.4042
2017-07-12 19:48:00	38.0993			2019-08-23 21:00:00	41.0743	39.4184
2017-07-12 20:03:00	38.1062			2019-08-23 22:00:00	41.0715	39.4325
2017-07-12 20:18:00	38.1149			2019-08-23 23:00:00	41.0719	39.4396
2017-07-12 20:33:00	38.1201			2019-08-24	41.069	39.4378
2017-07-12 20:48:00	38.127			2019-08-24 01:00:00	41.0695	39.4343
2017-07-12 21:03:00	38.1357			2019-08-24 02:00:00	41.0683	39.4201
2017-07-12 21:18:00	38.1478			2019-08-24 03:00:00	41.067	39.4131
2017-07-12 21:33:00	38.1582			2019-08-24 04:00:00	41.0658	39.4042
2017-07-12 21:48:00	38.1634			2019-08-24 05:00:00	41.063	39.3936
2017-07-12 22:03:00	38.1686			2019-08-24 06:00:00	41.0584	39.3777
2017-07-12 22:18:00	38.1756			2019-08-24 07:00:00	41.0622	39.3672
2017-07-12 22:33:00	38.179			2019-08-24 08:00:00	41.0593	39.3707
2017-07-12 22:48:00	38.1842			2019-08-24 09:00:00	41.0565	39.3954
2017-07-12 23:03:00	38.1894			2019-08-24 10:00:00	41.0536	39.4131
2017-07-12 23:18:00	38.1981			2019-08-24 11:00:00	41.0491	39.4343
2017-07-12 23:33:00	38.1998			2019-08-24 12:00:00	41.0462	39.4555
2017-07-12 23:48:00	38.2033			2019-08-24 13:00:00	41.0467	39.4696
2017-07-13 00:03:00	38.205			2019-08-24 14:00:00	41.0454	39.4767
2017-07-13 00:18:00	38.2085			2019-08-24 15:00:00	41.0475	39.4749
2017-07-13 00:33:00	38.212			2019-08-24 16:00:00	41.0447	39.4679
2017-07-13 00:48:00	38.2172			2019-08-24 17:00:00	41.0418	39.4537
2017-07-13 01:03:00	38.2172			2019-08-24 18:00:00	41.039	39.4449
2017-07-13 01:18:00	38.2207			2019-08-24 19:00:00	41.0427	39.4343
2017-07-13 01:33:00	38.2259			2019-08-24 20:00:00	41.0382	39.4325
2017-07-13 01:48:00	38.2259			2019-08-24 21:00:00	41.0387	39.4343
2017-07-13 02:03:00	38.2276			2019-08-24 22:00:00	41.0341	39.4484
2017-07-13 02:18:00	38.2311			2019-08-24 23:00:00	41.0313	39.4573
2017-07-13 02:33:00	38.2346			2019-08-25	41.0317	39.4679
2017-07-13 02:48:00	38.2328			2019-08-25 01:00:00	41.0272	39.4696
2017-07-13 03:03:00	38.2346			2019-08-25 02:00:00	41.0277	39.4679
2017-07-13 03:18:00	38.238			2019-08-25 03:00:00	41.0232	39.4679
2017-07-13 03:33:00	38.238			2019-08-25 04:00:00	41.022	39.4661
2017-07-13 03:48:00	38.2415			2019-08-25 05:00:00	41.0191	39.4449
2017-07-13 04:03:00	38.2398			2019-08-25 06:00:00	41.0163	39.4325
2017-07-13 04:18:00	38.2398			2019-08-25 07:00:00	41.0167	39.4131
2017-07-13 04:33:00	38.2415			2019-08-25 08:00:00	41.0172	39.406
2017-07-13 04:48:00	38.2398			2019-08-25 09:00:00	41.011	39.4184
2017-07-13 05:03:00	38.2415			2019-08-25 10:00:00	41.0148	39.4396
2017-07-13 05:18:00	38.2398			2019-08-25 11:00:00	41.0086	39.452
2017-07-13 05:33:00	38.2415			2019-08-25 12:00:00	41.0074	39.4749
2017-07-13 05:48:00	38.2398			2019-08-25 13:00:00	41.0062	39.4891
2017-07-13 06:03:00	38.2415			2019-08-25 14:00:00	41.0034	39.5033
2017-07-13 06:18:00	38.2415			2019-08-25 15:00:00	40.9973	39.5156
2017-07-13 06:33:00	38.2415			2019-08-25 16:00:00	40.9994	39.5174
2017-07-13 06:48:00	38.2415			2019-08-25 17:00:00	40.9998	39.5156
2017-07-13 07:03:00	38.2398			2019-08-25 18:00:00	40.9953	39.4979
2017-07-13 07:18:00	38.2415			2019-08-25 19:00:00	40.9908	39.4891
2017-07-13 07:33:00	38.2398			2019-08-25 20:00:00	40.9896	39.4767
2017-07-13 07:48:00	38.2398			2019-08-25 21:00:00	40.9901	39.4679
2017-07-13 08:03:00	38.2415			2019-08-25 22:00:00	40.9873	39.4696
2017-07-13 08:18:00	38.238			2019-08-25 23:00:00	40.9894	39.4749
2017-07-13 08:33:00	38.2398			2019-08-26	40.9832	39.4785
2017-07-13 08:48:00	38.2398			2019-08-26 01:00:00	40.9788	39.4926
2017-07-13 09:03:00	38.2415			2019-08-26 02:00:00	40.9792	39.5068
2017-07-13 09:18:00	38.2415			2019-08-26 03:00:00	40.9764	39.5121
2017-07-13 09:33:00	38.2398			2019-08-26 04:00:00	40.9735	39.5086
2017-07-13 09:48:00	38.2432			2019-08-26 05:00:00	40.9707	39.4997
2017-07-13 10:03:00	38.245			2019-08-26 06:00:00	40.9695	39.4802
2017-07-13 10:18:00	38.2467			2019-08-26 07:00:00	40.9667	39.4714
2017-07-13 10:33:00	38.2467			2019-08-26 08:00:00	40.9672	39.4643
2017-07-13 10:48:00	38.245			2019-08-26 09:00:00	40.966	39.4643
2017-07-13 11:03:00	38.2467			2019-08-26 10:00:00	40.9632	39.4679
2017-07-13 11:18:00	38.2537			2019-08-26 11:00:00	40.9653	39.4767
2017-07-13 11:33:00	38.2537			2019-08-26 12:00:00	40.9608	39.4926
2017-07-13 11:48:00	38.2537			2019-08-26 13:00:00	40.958	39.5209
2017-07-13 12:03:00	38.2537			2019-08-26 14:00:00	40.9551	39.5351
2017-07-13 12:18:00	38.2554			2019-08-26 15:00:00	40.9507	39.5581
2017-07-13 12:33:00	38.2571			2019-08-26 16:00:00	40.9495	39.5705
2017-07-13 12:48:00	38.2623			2019-08-26 17:00:00	40.9483	39.5723
2017-07-13 13:03:00	38.2623			2019-08-26 18:00:00	40.9471	39.5617
2017-07-13 13:18:00	38.2675			2019-08-26 19:00:00	40.9427	39.5422
2017-07-13 13:33:00	38.271			2019-08-26 20:00:00	40.9431	39.5227
2017-07-13 13:48:00	38.2745			2019-08-26 21:00:00	40.942	39.5015
2017-07-13 14:03:00	38.278			2019-08-26 22:00:00	40.9424	39.4926
2017-07-13 14:18:00	38.2814			2019-08-26 23:00:00	40.938	39.4909
2017-07-13 14:33:00	38.2832			2019-08-27	40.9417	39.4909
2017-07-13 14:48:00	38.2832			2019-08-27 01:00:00	40.9356	39.5015
2017-07-13 15:03:00	38.2832			2019-08-27 02:00:00	40.9311	39.5156
2017-07-13 15:18:00	38.2814			2019-08-27 03:00:00	40.9333	39.5262
2017-07-13 15:33:00	38.2832			2019-08-27 04:00:00	40.9305	39.5351
2017-07-13 15:48:00	38.2832			2019-08-27 05:00:00	40.9293	39.5369
2017-07-13 16:03:00	38.2832			2019-08-27 06:00:00	40.9265	39.5298
2017-07-13 16:18:00	38.2814			2019-08-27 07:00:00	40.9237	39.5156
2017-07-13 16:33:00	38.2814			2019-08-27 08:00:00	40.9241	39.4997
2017-07-13 16:48:00	38.2814			2019-08-27 09:00:00	40.9213	39.4909
2017-07-13 17:03:00	38.278			2019-08-27 10:00:00	40.9251	39.4909
2017-07-13 17:18:00	38.2745			2019-08-27 11:00:00	40.919	39.4909
2017-07-13 17:33:00	38.2728			2019-08-27 12:00:00	40.9228	39.4997
2017-07-13 17:48:00	38.2728			2019-08-27 13:00:00	40.9167	39.5245
2017-07-13 18:03:00	38.2693			2019-08-27 14:00:00	40.9122	39.5422
2017-07-13 18:18:00	38.2675			2019-08-27 15:00:00	40.9127	39.567
2017-07-13 18:33:00	38.2641			2019-08-27 16:00:00	40.9066	39.5918
2017-07-13 18:48:00	38.2641			2019-08-27 17:00:00	40.9038	39.606
2017-07-13 19:03:00	38.2623			2019-08-27 18:00:00	40.9059	39.6077
2017-07-13 19:18:00	38.2606			2019-08-27 19:00:00	40.9014	39.5971
2017-07-13 19:33:00	38.2606			2019-08-27 20:00:00	40.9019	39.5776
2017-07-13 19:48:00	38.2571			2019-08-27 21:00:00	40.9008	39.5581
2017-07-13 20:03:00	38.2571			2019-08-27 22:00:00	40.8996	39.5316
2017-07-13 20:18:00	38.2571			2019-08-27 23:00:00	40.8952	39.5192
2017-07-13 20:33:00	38.2571			2019-08-28	40.8989	39.5086
2017-07-13 20:48:00	38.2554			2019-08-28 01:00:00	40.8961	39.5086
2017-07-13 21:03:00	38.2554			2019-08-28 02:00:00	40.89	39.5227
2017-07-13 21:18:00	38.2554			2019-08-28 03:00:00	40.8872	39.5351
2017-07-13 21:33:00	38.2554			2019-08-28 04:00:00	40.8877	39.5528
2017-07-13 21:48:00	38.2537			2019-08-28 05:00:00	40.8849	39.5634
2017-07-13 22:03:00	38.2571			2019-08-28 06:00:00	40.8838	39.5652
2017-07-13 22:18:00	38.2571			2019-08-28 07:00:00	40.881	39.5546
2017-07-13 22:33:00	38.2606			2019-08-28 08:00:00	40.8831	39.5422
2017-07-13 22:48:00	38.2623			2019-08-28 09:00:00	40.8787	39.5298
2017-07-13 23:03:00	38.2623			2019-08-28 10:00:00	40.8808	39.5209
2017-07-13 23:18:00	38.2675			2019-08-28 11:00:00	40.8796	39.5086
2017-07-13 23:33:00	38.2675			2019-08-28 12:00:00	40.8769	39.5139
2017-07-13 23:48:00	38.2728			2019-08-28 13:00:00	40.8741	39.5227
2017-07-14 00:03:00	38.2745			2019-08-28 14:00:00	40.8713	39.544
2017-07-14 00:18:00	38.2814			2019-08-28 15:00:00	40.8685	39.5723
2017-07-14 00:33:00	38.2832			2019-08-28 16:00:00	40.8657	39.5971
2017-07-14 00:48:00	38.2814			2019-08-28 17:00:00	40.8662	39.6219
2017-07-14 01:03:00	38.2867			2019-08-28 18:00:00	40.865	39.6379
2017-07-14 01:18:00	38.2919			2019-08-28 19:00:00	40.8606	39.6379
2017-07-14 01:33:00	38.2936			2019-08-28 20:00:00	40.8562	39.6308
2017-07-14 01:48:00	38.2988			2019-08-28 21:00:00	40.8567	39.6077
2017-07-14 02:03:00	38.3023			2019-08-28 22:00:00	40.8588	39.5776
2017-07-14 02:18:00	38.304			2019-08-28 23:00:00	40.8544	39.5528
2017-07-14 02:33:00	38.3075			2019-08-29	40.8516	39.5369
2017-07-14 02:48:00	38.3127			2019-08-29 01:00:00	40.8488	39.5316
2017-07-14 03:03:00	38.3197			2019-08-29 02:00:00	40.8509	39.5404
2017-07-14 03:18:00	38.3179			2019-08-29 03:00:00	40.8498	39.5581
2017-07-14 03:33:00	38.3231			2019-08-29 04:00:00	40.8437	39.5741
2017-07-14 03:48:00	38.3249			2019-08-29 05:00:00	40.8426	39.5918
2017-07-14 04:03:00	38.3266			2019-08-29 06:00:00	40.8431	39.6077
2017-07-14 04:18:00	38.3249			2019-08-29 07:00:00	40.8419	39.6095
2017-07-14 04:33:00	38.3266			2019-08-29 08:00:00	40.8392	39.6095
2017-07-14 04:48:00	38.3249			2019-08-29 09:00:00	40.838	39.5971
2017-07-14 05:03:00	38.3231			2019-08-29 10:00:00	40.8402	39.5723
2017-07-14 05:18:00	38.3266			2019-08-29 11:00:00	40.839	39.5599
2017-07-14 05:33:00	38.3266			2019-08-29 12:00:00	40.8379	39.5457
2017-07-14 05:48:00	38.3231			2019-08-29 13:00:00	40.8351	39.5564
2017-07-14 06:03:00	38.3214			2019-08-29 14:00:00	32.6219	39.5634
2017-07-14 06:18:00	38.3145			2019-08-29 15:00:00	31.7464	39.5776
2017-07-14 06:33:00	38.3197			2019-08-29 16:00:00	33.6805	39.6131
2017-07-14 06:48:00	38.3145			2019-08-29 17:00:00	35.0208	39.6503
2017-07-14 07:03:00	38.3092			2019-08-29 18:00:00	35.9789	39.668
2017-07-14 07:18:00	38.3075			2019-08-29 19:00:00	36.7095	39.6751
2017-07-14 07:33:00	38.304			2019-08-29 20:00:00	37.2729	39.6716
2017-07-14 07:48:00	38.304			2019-08-29 21:00:00	37.7111	39.6521
2017-07-14 08:03:00	38.3023			2019-08-29 22:00:00	38.0605	39.6272
2017-07-14 08:18:00	38.3023			2019-08-29 23:00:00	38.3443	39.6201
2017-07-14 08:33:00	38.2988			2019-08-30	38.5809	39.6113
2017-07-14 08:48:00	38.2971			2019-08-30 01:00:00	38.7797	39.6077
2017-07-14 09:03:00	38.2936			2019-08-30 02:00:00	38.9452	39.6131
2017-07-14 09:18:00	38.2971			2019-08-30 03:00:00	39.0821	39.6201
2017-07-14 09:33:00	38.2971			2019-08-30 04:00:00	39.2048	39.6396
2017-07-14 09:48:00	38.2971			2019-08-30 05:00:00	39.3018	39.6574
2017-07-14 10:03:00	38.2953			2019-08-30 06:00:00	39.4022	39.6804
2017-07-14 10:18:00	38.2919			2019-08-30 07:00:00	39.4833	39.7017
2017-07-14 10:33:00	38.2953			2019-08-30 08:00:00	39.5564	39.7053
2017-07-14 10:48:00	38.2971			2019-08-30 09:00:00	39.6248	39.7
2017-07-14 11:03:00	38.2988			2019-08-30 10:00:00	39.6834	39.6804
2017-07-14 11:18:00	38.2936			2019-08-30 11:00:00	39.7389	39.6574
2017-07-14 11:33:00	38.2971			2019-08-30 12:00:00	39.7847	39.6396
2017-07-14 11:48:00	38.2988			2019-08-30 13:00:00	39.8257	39.629
2017-07-14 12:03:00	38.3006			2019-08-30 14:00:00	39.87	39.6308
2017-07-14 12:18:00	38.304			2019-08-30 15:00:00	39.8964	39.6521
2017-07-14 12:33:00	38.304			2019-08-30 16:00:00	39.9261	39.6751
2017-07-14 12:48:00	38.3092			2019-08-30 17:00:00	39.9623	39.7
2017-07-14 13:03:00	38.3127			2019-08-30 18:00:00	39.9888	39.7301
2017-07-14 13:18:00	38.3179			2019-08-30 19:00:00	40.0168	39.7479
2017-07-14 13:33:00	38.3179			2019-08-30 20:00:00	40.0417	39.7426
2017-07-14 13:48:00	38.3231			2019-08-30 21:00:00	40.0649	39.7213
2017-07-14 14:03:00	38.3249			2019-08-30 22:00:00	40.0833	39.7088
2017-07-14 14:18:00	38.3266			2019-08-30 23:00:00	40.0969	39.6698
2017-07-14 14:33:00	38.3284			2019-08-31	40.1201	39.6326
2017-07-14 14:48:00	38.3301			2019-08-31 01:00:00	40.1401	39.6077
2017-07-14 15:03:00	38.3284			2019-08-31 02:00:00	40.152	39.5953
2017-07-14 15:18:00	38.3318			2019-08-31 03:00:00	40.1655	39.5989
2017-07-14 15:33:00	38.3301			2019-08-31 04:00:00	40.1888	39.6077
2017-07-14 15:48:00	38.3301			2019-08-31 05:00:00	40.191	39.6308
2017-07-14 16:03:00	38.3301			2019-08-31 06:00:00	40.2045	39.6538
2017-07-14 16:18:00	38.3284			2019-08-31 07:00:00	40.2132	39.6751
2017-07-14 16:33:00	38.3301			2019-08-31 08:00:00	40.2267	39.6875
2017-07-14 16:48:00	38.3301			2019-08-31 09:00:00	40.2337	39.6911
2017-07-14 17:03:00	38.3266			2019-08-31 10:00:00	40.2424	39.684
2017-07-14 17:18:00	38.3249			2019-08-31 11:00:00	40.2575	39.6716
2017-07-14 17:33:00	38.3231			2019-08-31 12:00:00	40.263	39.6485
2017-07-14 17:48:00	38.3249			2019-08-31 13:00:00	40.2684	39.6201
2017-07-14 18:03:00	38.3214			2019-08-31 14:00:00	40.2738	39.6131
2017-07-14 18:18:00	38.3179			2019-08-31 15:00:00	40.2792	39.6095
2017-07-14 18:33:00	38.3145			2019-08-31 16:00:00	40.2814	39.6308
2017-07-14 18:48:00	38.3092			2019-08-31 17:00:00	40.29	39.6556
2017-07-14 19:03:00	38.3058			2019-08-31 18:00:00	40.2955	39.6787
2017-07-14 19:18:00	38.3023			2019-08-31 19:00:00	40.3009	39.7071
2017-07-14 19:33:00	38.3023			2019-08-31 20:00:00	40.3063	39.7195
2017-07-14 19:48:00	38.2971			2019-08-31 21:00:00	40.3052	39.7195
2017-07-14 20:03:00	38.2953			2019-08-31 22:00:00	40.3025	39.7124
2017-07-14 20:18:00	38.2953			2019-08-31 23:00:00	40.3096	39.6893
2017-07-14 20:33:00	38.2919			2019-09-01	40.3101	39.645
2017-07-14 20:48:00	38.2901			2019-09-01 01:00:00	40.3123	39.6077
2017-07-14 21:03:00	38.2867			2019-09-01 02:00:00	40.3112	39.59
2017-07-14 21:18:00	38.2849			2019-09-01 03:00:00	40.3118	39.5812
2017-07-14 21:33:00	38.2849			2019-09-01 04:00:00	40.3172	39.5847
2017-07-14 21:48:00	38.2814			2019-09-01 05:00:00	40.3194	39.6024
2017-07-14 22:03:00	38.2814			2019-09-01 06:00:00	40.3183	39.6201
2017-07-14 22:18:00	38.2797			2019-09-01 07:00:00	40.3188	39.6485
2017-07-14 22:33:00	38.2832			2019-09-01 08:00:00	40.321	39.668
2017-07-14 22:48:00	38.2849			2019-09-01 09:00:00	40.3313	39.6787
2017-07-14 23:03:00	38.2849			2019-09-01 10:00:00	40.3529	39.6751
2017-07-14 23:18:00	38.2867			2019-09-01 11:00:00	40.3665	39.6574
2017-07-14 23:33:00	38.2901			2019-09-01 12:00:00	40.3865	39.6432
2017-07-14 23:48:00	38.2936			2019-09-01 13:00:00	40.3886	39.6166
2017-07-15 00:03:00	38.2971			2019-09-01 14:00:00	40.3859	39.5989
2017-07-15 00:18:00	38.2988			2019-09-01 15:00:00	40.3849	39.5989
2017-07-15 00:33:00	38.304			2019-09-01 16:00:00	40.387	39.6077
2017-07-15 00:48:00	38.3023			2019-09-01 17:00:00	40.3989	39.6219
2017-07-15 01:03:00	38.3075			2019-09-01 18:00:00	40.4044	39.6467
2017-07-15 01:18:00	38.3145			2019-09-01 19:00:00	40.4017	39.6716
2017-07-15 01:33:00	38.3162			2019-09-01 20:00:00	40.4071	39.6893
2017-07-15 01:48:00	38.3266			2019-09-01 21:00:00	40.406	39.7017
2017-07-15 02:03:00	38.3249			2019-09-01 22:00:00	40.4033	39.6982
2017-07-15 02:18:00	38.3301			2019-09-01 23:00:00	40.4006	39.684
2017-07-15 02:33:00	38.3353			2019-09-02	40.3996	39.6591
2017-07-15 02:48:00	38.3405			2019-09-02 01:00:00	36.5284	39.6201
2017-07-15 03:03:00	38.3423			2019-09-02 02:00:00	36.7993	39.5953
2017-07-15 03:18:00	38.3509			2019-09-02 03:00:00	37.8475	39.5688
2017-07-15 03:33:00	38.3509			2019-09-02 04:00:00	38.483	39.5617
2017-07-15 03:48:00	38.3544			2019-09-02 05:00:00	38.8959	39.5617
2017-07-15 04:03:00	38.3579			2019-09-02 06:00:00	39.176	39.5723
2017-07-15 04:18:00	38.3579			2019-09-02 07:00:00	39.3799	39.5882
2017-07-15 04:33:00	38.3597			2019-09-02 08:00:00	39.5377	39.6131
2017-07-15 04:48:00	38.3597			2019-09-02 09:00:00	39.6492	39.6432
2017-07-15 05:03:00	38.3614			2019-09-02 10:00:00	39.7382	39.6503
2017-07-15 05:18:00	38.3597			2019-09-02 11:00:00	39.8209	39.6485
2017-07-15 05:33:00	38.3597			2019-09-02 12:00:00	39.8746	39.6396
2017-07-15 05:48:00	38.3597			2019-09-02 13:00:00	39.9219	39.6201
2017-07-15 06:03:00	38.3597			2019-09-02 14:00:00	39.9596	39.5971
2017-07-15 06:18:00	38.3597			2019-09-02 15:00:00	40.0053	39.5829
2017-07-15 06:33:00	38.3562			2019-09-02 16:00:00	40.0301	39.5652
2017-07-15 06:48:00	38.3527			2019-09-02 17:00:00	40.05	39.5634
2017-07-15 07:03:00	38.3509			2019-09-02 18:00:00	40.0893	39.567
2017-07-15 07:18:00	38.3509			2019-09-02 19:00:00	40.1061	39.5794
2017-07-15 07:33:00	38.344			2019-09-02 20:00:00	40.1163	39.5989
2017-07-15 07:48:00	38.344			2019-09-02 21:00:00	40.1363	39.6184
2017-07-15 08:03:00	38.3388			2019-09-02 22:00:00	40.1514	39.6396
2017-07-15 08:18:00	38.3353			2019-09-02 23:00:00	40.1681	39.6432
2017-07-15 08:33:00	38.3301			2019-09-03	40.18	39.6343
2017-07-15 08:48:00	38.3301			2019-09-03 01:00:00	40.1935	39.6148
2017-07-15 09:03:00	38.3249			2019-09-03 02:00:00	29.3916	39.5882
2017-07-15 09:18:00	38.3266			2019-09-03 03:00:00	30.3623	39.5617
2017-07-15 09:33:00	38.3266			2019-09-03 04:00:00	31.4645	39.5528
2017-07-15 09:48:00	38.3197			2019-09-03 05:00:00	32.9816	39.5422
2017-07-15 10:03:00	38.3179			2019-09-03 06:00:00	34.0714	39.551
2017-07-15 10:18:00	38.3197			2019-09-03 07:00:00	34.9137	39.5634
2017-07-15 10:33:00	38.3179			2019-09-03 08:00:00	35.5865	39.5865
2017-07-15 10:48:00	38.3162			2019-09-03 09:00:00	36.137	39.6131
2017-07-15 11:03:00	38.3127			2019-09-03 10:00:00	36.5809	39.6396
2017-07-15 11:18:00	38.311			2019-09-03 11:00:00	36.9624	39.6556
2017-07-15 11:33:00	38.311			2019-09-03 12:00:00	37.2777	39.6556
2017-07-15 11:48:00	38.311			2019-09-03 13:00:00	37.5451	39.6521
2017-07-15 12:03:00	38.311			2019-09-03 14:00:00	37.7754	39.6379
2017-07-15 12:18:00	38.3127			2019-09-03 15:00:00	37.9747	39.6272
2017-07-15 12:33:00	38.3162			2019-09-03 16:00:00	38.1443	39.6201
2017-07-15 12:48:00	38.3197			2019-09-03 17:00:00	38.303	39.6219
2017-07-15 13:03:00	38.3197			2019-09-03 18:00:00	38.4367	39.6308
2017-07-15 13:18:00	38.3197			2019-09-03 19:00:00	38.5594	39.6432
2017-07-15 13:33:00	38.3231			2019-09-03 20:00:00	38.6695	39.6645
2017-07-15 13:48:00	38.3249			2019-09-03 21:00:00	38.7671	39.6875
2017-07-15 14:03:00	38.3231			2019-09-03 22:00:00	38.8552	39.7035
2017-07-15 14:18:00	38.3284			2019-09-03 23:00:00	38.9481	39.7106
2017-07-15 14:33:00	38.3284			2019-09-04	39.0172	39.7106
2017-07-15 14:48:00	38.3301			2019-09-04 01:00:00	39.0927	39.7017
2017-07-15 15:03:00	38.337			2019-09-04 02:00:00	34.7049	39.6787
2017-07-15 15:18:00	38.337			2019-09-04 03:00:00	32.4886	39.6591
2017-07-15 15:33:00	38.3423			2019-09-04 04:00:00	33.1366	39.6379
2017-07-15 15:48:00	38.344			2019-09-04 05:00:00	34.5265	39.6308
2017-07-15 16:03:00	38.3423			2019-09-04 06:00:00	35.4124	39.6308
2017-07-15 16:18:00	38.3423			2019-09-04 07:00:00	36.0608	39.6361
2017-07-15 16:33:00	38.344			2019-09-04 08:00:00	36.56	39.6485
2017-07-15 16:48:00	38.3423			2019-09-04 09:00:00	36.9659	39.668
2017-07-15 17:03:00	38.3423			2019-09-04 10:00:00	37.3028	39.6858
2017-07-15 17:18:00	38.3423			2019-09-04 11:00:00	37.5685	39.7
2017-07-15 17:33:00	38.3405			2019-09-04 12:00:00	37.8033	39.7053
2017-07-15 17:48:00	38.337			2019-09-04 13:00:00	37.9993	39.7017
2017-07-15 18:03:00	38.337			2019-09-04 14:00:00	38.1687	39.6929
2017-07-15 18:18:00	38.3318			2019-09-04 15:00:00	38.3178	39.6769
2017-07-15 18:33:00	38.3301			2019-09-04 16:00:00	38.4466	39.668
2017-07-15 18:48:00	38.3266			2019-09-04 17:00:00	38.5644	39.6591
2017-07-15 19:03:00	38.3249			2019-09-04 18:00:00	38.6602	39.6574
2017-07-15 19:18:00	38.3266			2019-09-04 19:00:00	38.7592	39.668
2017-07-15 19:33:00	38.3214			2019-09-04 20:00:00	38.8376	39.6751
2017-07-15 19:48:00	38.3197			2019-09-04 21:00:00	25.3278	39.6858
2017-07-15 20:03:00	38.3162			2019-09-04 22:00:00	27.1369	39.7017
2017-07-15 20:18:00	38.3092			2019-09-04 23:00:00	29.3202	39.7124
2017-07-15 20:33:00	38.3075			2019-09-05	31.0577	39.7141
2017-07-15 20:48:00	38.3023			2019-09-05 01:00:00	32.2964	39.7
2017-07-15 21:03:00	38.304			2019-09-05 02:00:00	33.2542	39.684
2017-07-15 21:18:00	38.304			2019-09-05 03:00:00	34.0312	39.6609
2017-07-15 21:33:00	38.3023			2019-09-05 04:00:00	34.6511	39.645
2017-07-15 21:48:00	38.2988			2019-09-05 05:00:00	35.1752	39.6272
2017-07-15 22:03:00	38.2971			2019-09-05 06:00:00	35.6134	39.6201
2017-07-15 22:18:00	38.2953			2019-09-05 07:00:00	35.9849	39.6255
2017-07-15 22:33:00	38.2953			2019-09-05 08:00:00	36.3016	39.6361
2017-07-15 22:48:00	38.2953			2019-09-05 09:00:00	36.5788	39.6485
2017-07-15 23:03:00	38.2936			2019-09-05 10:00:00	36.8269	39.6716
2017-07-15 23:18:00	38.2953			2019-09-05 11:00:00	37.0381	39.684
2017-07-15 23:33:00	38.2971			2019-09-05 12:00:00	37.2262	39.6929
2017-07-15 23:48:00	38.2971			2019-09-05 13:00:00	37.3959	39.7017
2017-07-16 00:03:00	38.3006			2019-09-05 14:00:00	37.5516	39.6982
2017-07-16 00:18:00	38.3023			2019-09-05 15:00:00	37.6919	39.6893
2017-07-16 00:33:00	38.304			2019-09-05 16:00:00	37.8277	39.6787
2017-07-16 00:48:00	38.304			2019-09-05 17:00:00	37.9415	39.6698
2017-07-16 01:03:00	38.3075			2019-09-05 18:00:00	38.0508	39.6521
2017-07-16 01:18:00	38.3127			2019-09-05 19:00:00	38.1633	39.6521
2017-07-16 01:33:00	38.3179			2019-09-05 20:00:00	38.2476	39.6538
2017-07-16 01:48:00	38.3249			2019-09-05 21:00:00	38.3319	39.6574
2017-07-16 02:03:00	38.3249			2019-09-05 22:00:00	38.4194	39.6716
2017-07-16 02:18:00	38.3284			2019-09-05 23:00:00	38.5022	39.6787
2017-07-16 02:33:00	38.3353			2019-09-06	38.5741	39.6911
2017-07-16 02:48:00	38.3405			2019-09-06 01:00:00	38.6333	39.6982
2017-07-16 03:03:00	38.3457			2019-09-06 02:00:00	38.7067	39.6911
2017-07-16 03:18:00	38.3509			2019-09-06 03:00:00	38.7708	39.6858
2017-07-16 03:33:00	38.3562			2019-09-06 04:00:00	38.8269	39.6787
2017-07-16 03:48:00	38.3614			2019-09-06 05:00:00	38.8751	39.6609
2017-07-16 04:03:00	38.3631			2019-09-06 06:00:00	38.9313	39.6574
2017-07-16 04:18:00	38.3701			2019-09-06 07:00:00	38.978	39.6591
2017-07-16 04:33:00	38.3718			2019-09-06 08:00:00	39.0263	39.6591
2017-07-16 04:48:00	38.3718			2019-09-06 09:00:00	39.0778	39.6751
2017-07-16 05:03:00	38.3753			2019-09-06 10:00:00	39.107	39.6911
2017-07-16 05:18:00	38.377			2019-09-06 11:00:00	39.1554	39.7053
2017-07-16 05:33:00	38.3788			2019-09-06 12:00:00	39.199	39.7213
2017-07-16 05:48:00	38.3909			2019-09-06 13:00:00	39.2314	39.7284
2017-07-16 06:03:00	38.3962			2019-09-06 14:00:00	39.2703	39.7337
2017-07-16 06:18:00	38.4049			2019-09-06 15:00:00	39.3075	39.7301
2017-07-16 06:33:00	38.4049			2019-09-06 16:00:00	39.3432	39.723
2017-07-16 06:48:00	38.4031			2019-09-06 17:00:00	39.3709	39.7141
2017-07-16 07:03:00	38.3997			2019-09-06 18:00:00	39.4066	39.7017
2017-07-16 07:18:00	38.4014			2019-09-06 19:00:00	39.4375	39.6893
2017-07-16 07:33:00	38.4014			2019-09-06 20:00:00	39.4605	39.6822
2017-07-16 07:48:00	38.3979			2019-09-06 21:00:00	39.4993	39.684
2017-07-16 08:03:00	38.3927			2019-09-06 22:00:00	39.5303	39.6911
2017-07-16 08:18:00	38.3875			2019-09-06 23:00:00	39.5517	39.7017
2017-07-16 08:33:00	38.3857			2019-09-07	39.5746	39.7159
2017-07-16 08:48:00	38.3823			2019-09-07 01:00:00	39.6008	39.7284
2017-07-16 09:03:00	38.384			2019-09-07 02:00:00	39.6158	39.7372
2017-07-16 09:18:00	38.3788			2019-09-07 03:00:00	39.4123	39.7337
2017-07-16 09:33:00	38.3753			2019-09-07 04:00:00	36.2101	39.7213
2017-07-16 09:48:00	38.3718			2019-09-07 05:00:00	36.7689	39.7195
2017-07-16 10:03:00	38.3718			2019-09-07 06:00:00	37.5804	39.7017
2017-07-16 10:18:00	38.3683			2019-09-07 07:00:00	38.1285	39.6875
2017-07-16 10:33:00	38.3701			2019-09-07 08:00:00	28.2724	39.6875
2017-07-16 10:48:00	38.3701			2019-09-07 09:00:00	30.3667	39.6822
2017-07-16 11:03:00	38.3979			2019-09-07 10:00:00	32.1314	39.6929
2017-07-16 11:18:00	38.4014			2019-09-07 11:00:00	33.3414	39.6982
2017-07-16 11:33:00	38.3997			2019-09-07 12:00:00	34.2606	39.7071
2017-07-16 11:48:00	38.4014			2019-09-07 13:00:00	34.9644	39.7159
2017-07-16 12:03:00	38.4014			2019-09-07 14:00:00	35.5363	39.7266
2017-07-16 12:18:00	38.3997			2019-09-07 15:00:00	36.0147	39.7355
2017-07-16 12:33:00	38.3997			2019-09-07 16:00:00	36.4035	39.7355
2017-07-16 12:48:00	38.3979			2019-09-07 17:00:00	36.7423	39.7266
2017-07-16 13:03:00	38.3997			2019-09-07 18:00:00	37.0197	39.7159
2017-07-16 13:18:00	38.4014			2019-09-07 19:00:00	37.2634	39.7053
2017-07-16 13:33:00	38.3997			2019-09-07 20:00:00	37.4749	39.7
2017-07-16 13:48:00	38.3997			2019-09-07 21:00:00	37.6616	39.6858
2017-07-16 14:03:00	38.4049			2019-09-07 22:00:00	37.8236	39.6893
2017-07-16 14:18:00	38.4031			2019-09-07 23:00:00	37.967	39.6911
2017-07-16 14:33:00	38.4083			2019-09-08	38.1011	39.6982
2017-07-16 14:48:00	38.4118			2019-09-08 01:00:00	38.2197	39.7071
2017-07-16 15:03:00	38.4118			2019-09-08 02:00:00	38.3337	39.7177
2017-07-16 15:18:00	38.4153			2019-09-08 03:00:00	38.4273	39.7248
2017-07-16 15:33:00	38.4171			2019-09-08 04:00:00	38.5194	39.7319
2017-07-16 15:48:00	38.4205			2019-09-08 05:00:00	38.6021	39.7248
2017-07-16 16:03:00	38.424			2019-09-08 06:00:00	38.6864	39.7159
2017-07-16 16:18:00	38.424			2019-09-08 07:00:00	38.755	39.7053
2017-07-16 16:33:00	38.4258			2019-09-08 08:00:00	38.8205	39.7
2017-07-16 16:48:00	38.4292			2019-09-08 09:00:00	38.8844	39.6875
2017-07-16 17:03:00	38.4292			2019-09-08 10:00:00	38.9452	39.6982
2017-07-16 17:18:00	38.431			2019-09-08 11:00:00	39.006	39.7035
2017-07-16 17:33:00	38.431			2019-09-08 12:00:00	39.0605	39.7124
2017-07-16 17:48:00	38.4292			2019-09-08 13:00:00	39.1055	39.7248
2017-07-16 18:03:00	38.431			2019-09-08 14:00:00	39.1538	39.7408
2017-07-16 18:18:00	38.4275			2019-09-08 15:00:00	39.2036	39.7514
2017-07-16 18:33:00	38.4275			2019-09-08 16:00:00	39.2455	39.755
2017-07-16 18:48:00	38.424			2019-09-08 17:00:00	39.2922	39.7514
2017-07-16 19:03:00	38.424			2019-09-08 18:00:00	39.3214	39.7443
2017-07-16 19:18:00	38.4205			2019-09-08 19:00:00	39.3665	39.7337
2017-07-16 19:33:00	38.4188			2019-09-08 20:00:00	39.3989	39.7141
2017-07-16 19:48:00	38.4171			2019-09-08 21:00:00	39.4346	39.6982
2017-07-16 20:03:00	38.4118			2019-09-08 22:00:00	39.4702	39.6787
2017-07-16 20:18:00	38.4118			2019-09-08 23:00:00	39.5042	39.6787
2017-07-16 20:33:00	38.4083			2019-09-09	39.5335	39.6875
2017-07-16 20:48:00	38.4049			2019-09-09 01:00:00	39.558	39.6929
2017-07-16 21:03:00	38.4049			2019-09-09 02:00:00	39.5905	39.7141
2017-07-16 21:18:00	38.3997			2019-09-09 03:00:00	39.6182	39.723
2017-07-16 21:33:00	38.4014			2019-09-09 04:00:00	39.6507	39.7337
2017-07-16 21:48:00	38.3979			2019-09-09 05:00:00	39.68	39.7408
2017-07-16 22:03:00	38.3944			2019-09-09 06:00:00	39.6997	39.7355
2017-07-16 22:18:00	38.3909			2019-09-09 07:00:00	39.7195	39.7284
2017-07-16 22:33:00	38.3892			2019-09-09 08:00:00	39.7424	39.7195
2017-07-16 22:48:00	38.3857			2019-09-09 09:00:00	39.7685	39.7141
2017-07-16 23:03:00	38.384			2019-09-09 10:00:00	20.6369	39.7124
2017-07-16 23:18:00	38.3857			2019-09-09 11:00:00	25.007	39.7124
2017-07-16 23:33:00	38.3857			2019-09-09 12:00:00	27.4918	39.7141
2017-07-16 23:48:00	38.3857			2019-09-09 13:00:00	28.2842	39.7266
2017-07-17 00:03:00	38.3857			2019-09-09 14:00:00	29.2904	39.7426
2017-07-17 00:18:00	38.3857			2019-09-09 15:00:00	30.6038	39.7532
2017-07-17 00:33:00	38.3857			2019-09-09 16:00:00	31.6583	39.7639
2017-07-17 00:48:00	38.3909			2019-09-09 17:00:00	32.5288	39.7674
2017-07-17 01:03:00	38.3909			2019-09-09 18:00:00	33.2486	39.7603
2017-07-17 01:18:00	38.3944			2019-09-09 19:00:00	33.8633	39.7514
2017-07-17 01:33:00	38.3979			2019-09-09 20:00:00	34.3902	39.7337
2017-07-17 01:48:00	38.4014			2019-09-09 21:00:00	34.841	39.7124
2017-07-17 02:03:00	38.4031			2019-09-09 22:00:00	35.2364	39.7
2017-07-17 02:18:00	38.4031			2019-09-09 23:00:00	35.5868	39.6858
2017-07-17 02:33:00	38.4083			2019-09-10	35.8873	39.6787
2017-07-17 02:48:00	38.4118			2019-09-10 01:00:00	36.1623	39.6822
2017-07-17 03:03:00	38.4171			2019-09-10 02:00:00	36.4038	39.6875
2017-07-17 03:18:00	38.424			2019-09-10 03:00:00	36.6225	39.7017
2017-07-17 03:33:00	38.4275			2019-09-10 04:00:00	36.823	39.7106
2017-07-17 03:48:00	38.4327			2019-09-10 05:00:00	37.0052	39.7195
2017-07-17 04:03:00	38.4397			2019-09-10 06:00:00	37.1721	39.7195
2017-07-17 04:18:00	38.4414			2019-09-10 07:00:00	37.3221	39.7141
2017-07-17 04:33:00	38.4484			2019-09-10 08:00:00	37.4629	39.7
2017-07-17 04:48:00	38.4519			2019-09-10 09:00:00	37.5884	39.6787
2017-07-17 05:03:00	38.4536			2019-09-10 10:00:00	37.7139	39.6645
2017-07-17 05:18:00	38.6926			2019-09-10 11:00:00	37.8302	39.6556
2017-07-17 05:33:00	38.7591			2019-09-10 12:00:00	37.9278	39.6538
2017-07-17 05:48:00	38.7801			2019-09-10 13:00:00	38.0255	39.6609
2017-07-17 06:03:00	38.7871			2019-09-10 14:00:00	38.1202	39.6751
2017-07-17 06:18:00	38.7888			2019-09-10 15:00:00	38.2055	39.6893
2017-07-17 06:33:00	38.7958			2019-09-10 16:00:00	38.2893	39.7053
2017-07-17 06:48:00	38.7993			2019-09-10 17:00:00	38.37	39.7159
2017-07-17 07:03:00	38.7976			2019-09-10 18:00:00	38.4477	39.7159
2017-07-17 07:18:00	38.7976			2019-09-10 19:00:00	38.5191	39.7071
2017-07-17 07:33:00	38.794			2019-09-10 20:00:00	38.5795	39.6964
2017-07-17 07:48:00	38.7888			2019-09-10 21:00:00	38.6462	39.6716
2017-07-17 08:03:00	38.7871			2019-09-10 22:00:00	38.7099	39.6485
2017-07-17 08:18:00	38.7818			2019-09-10 23:00:00	38.7672	39.6219
2017-07-17 08:33:00	38.7801			2019-09-11	38.8215	39.606
2017-07-17 08:48:00	38.7748			2019-09-11 01:00:00	38.8758	39.6006
2017-07-17 09:03:00	38.7678			2019-09-11 02:00:00	38.9222	39.6077
2017-07-17 09:18:00	38.7591			2019-09-11 03:00:00	38.9812	39.606
2017-07-17 09:33:00	38.7591			2019-09-11 04:00:00	39.0308	39.6095
2017-07-17 09:48:00	38.7503			2019-09-11 05:00:00	39.071	39.6166
2017-07-17 10:03:00	38.7398			2019-09-11 06:00:00	39.119	39.6201
2017-07-17 10:18:00	38.7381			2019-09-11 07:00:00	39.1624	39.6237
2017-07-17 10:33:00	38.7293			2019-09-11 08:00:00	39.2026	39.6166
2017-07-17 10:48:00	38.7223			2019-09-11 09:00:00	39.2396	39.6077
2017-07-17 11:03:00	38.7188			2019-09-11 10:00:00	39.2798	39.5971
2017-07-17 11:18:00	38.7118			2019-09-11 11:00:00	39.3184	39.5865
2017-07-17 11:33:00	38.7031			2019-09-11 12:00:00	39.3523	39.59
2017-07-17 11:48:00	38.7013			2019-09-11 13:00:00	39.3847	39.5953
2017-07-17 12:03:00	38.6979			2019-09-11 14:00:00	39.4202	39.6077
2017-07-17 12:18:00	38.6944			2019-09-11 15:00:00	39.4478	39.6219
2017-07-17 12:33:00	38.6874			2019-09-11 16:00:00	39.4754	39.6467
2017-07-17 12:48:00	38.6821			2019-09-11 17:00:00	39.5014	39.6751
2017-07-17 13:03:00	38.6821			2019-09-11 18:00:00	39.5321	39.6929
2017-07-17 13:18:00	38.6786			2019-09-11 19:00:00	39.5598	39.7
2017-07-17 13:33:00	38.6786			2019-09-11 20:00:00	39.5794	39.6946
2017-07-17 13:48:00	38.6769			2019-09-11 21:00:00	39.6102	39.6858
2017-07-17 14:03:00	38.6769			2019-09-11 22:00:00	39.6252	39.6716
2017-07-17 14:18:00	38.6786			2019-09-11 23:00:00	39.6528	39.6538
2017-07-17 14:33:00	38.6786			2019-09-12	39.6788	39.6432
2017-07-17 14:48:00	38.6821			2019-09-12 01:00:00	39.6922	39.6379
2017-07-17 15:03:00	38.6821			2019-09-12 02:00:00	39.7103	39.6467
2017-07-17 15:18:00	38.6891			2019-09-12 03:00:00	39.7284	39.6698
2017-07-17 15:33:00	38.6961			2019-09-12 04:00:00	39.7418	39.6911
2017-07-17 15:48:00	38.6979			2019-09-12 05:00:00	39.7599	39.7159
2017-07-17 16:03:00	38.7031			2019-09-12 06:00:00	39.8161	39.7443
2017-07-17 16:18:00	38.7031			2019-09-12 07:00:00	39.8581	39.7514
2017-07-17 16:33:00	38.7083			2019-09-12 08:00:00	39.8778	39.7585
2017-07-17 16:48:00	38.7171			2019-09-12 09:00:00	39.9341	39.7514
2017-07-17 17:03:00	38.7206			2019-09-12 10:00:00	39.9538	39.7372
2017-07-17 17:18:00	38.7223			2019-09-12 11:00:00	39.9688	39.723
2017-07-17 17:33:00	38.7258			2019-09-12 12:00:00	39.9853	39.7124
2017-07-17 17:48:00	38.7293			2019-09-12 13:00:00	40.0035	39.7159
2017-07-17 18:03:00	38.7328			2019-09-12 14:00:00	40.0136	39.7266
2017-07-17 18:18:00	38.7381			2019-09-12 15:00:00	40.0286	39.7514
2017-07-17 18:33:00	38.7398			2019-09-12 16:00:00	40.0452	39.7799
2017-07-17 18:48:00	38.7398			2019-09-12 17:00:00	40.0554	39.8048
2017-07-17 19:03:00	38.7398			2019-09-12 18:00:00	40.0655	39.8279
2017-07-17 19:18:00	38.7363			2019-09-12 19:00:00	40.0821	39.8368
2017-07-17 19:33:00	38.7346			2019-09-12 20:00:00	40.0939	39.8368
2017-07-17 19:48:00	38.7293			2019-09-12 21:00:00	40.1089	39.8261
2017-07-17 20:03:00	38.7293			2019-09-12 22:00:00	40.1175	39.8048
2017-07-17 20:18:00	38.7258			2019-09-12 23:00:00	40.1213	39.7745
2017-07-17 20:33:00	38.7206			2019-09-13	40.1331	39.7514
2017-07-17 20:48:00	38.7188			2019-09-13 01:00:00	40.1433	39.7426
2017-07-17 21:03:00	38.7153			2019-09-13 02:00:00	40.1503	39.7479
2017-07-17 21:18:00	38.7136			2019-09-13 03:00:00	40.17	39.7621
2017-07-17 21:33:00	38.7031			2019-09-13 04:00:00	40.2041	39.7816
2017-07-17 21:48:00	38.7031			2019-09-13 05:00:00	40.2239	39.8065
2017-07-17 22:03:00	38.6979			2019-09-13 06:00:00	40.2356	39.8279
2017-07-17 22:18:00	38.6961			2019-09-13 07:00:00	40.2395	39.8492
2017-07-17 22:33:00	38.6874			2019-09-13 08:00:00	40.2688	39.8546
2017-07-17 22:48:00	38.6821			2019-09-13 09:00:00	40.279	39.8546
2017-07-17 23:03:00	38.6786			2019-09-13 10:00:00	40.2876	39.8457
2017-07-17 23:18:00	38.6769			2019-09-13 11:00:00	40.2946	39.8314
2017-07-17 23:33:00	38.6769			2019-09-13 12:00:00	40.3016	39.8137
2017-07-17 23:48:00	38.6716			2019-09-13 13:00:00	40.3246	39.8101
2017-07-18 00:03:00	38.6716			2019-09-13 14:00:00	40.3395	39.8154
2017-07-18 00:18:00	38.6699			2019-09-13 15:00:00	40.3497	39.8332
2017-07-18 00:33:00	38.6681			2019-09-13 16:00:00	40.3536	39.8546
2017-07-18 00:48:00	38.6681			2019-09-13 17:00:00	40.359	39.8741
2017-07-18 01:03:00	38.6681			2019-09-13 18:00:00	40.366	39.8955
2017-07-18 01:18:00	38.6681			2019-09-13 19:00:00	40.3746	39.9062
2017-07-18 01:33:00	38.6716			2019-09-13 20:00:00	40.3816	39.9062
2017-07-18 01:48:00	38.6734			2019-09-13 21:00:00	40.3966	39.9044
2017-07-18 02:03:00	38.6751			2019-09-13 22:00:00	40.4275	39.8919
2017-07-18 02:18:00	38.6769			2019-09-13 23:00:00	40.4329	39.8652
2017-07-18 02:33:00	38.6821			2019-09-14	40.4384	39.8457
2017-07-18 02:48:00	38.6856			2019-09-14 01:00:00	40.447	39.8261
2017-07-18 03:03:00	38.6961			2019-09-14 02:00:00	40.4524	39.8243
2017-07-18 03:18:00	38.6996			2019-09-14 03:00:00	40.4785	39.8297
2017-07-18 03:33:00	38.7049			2019-09-14 04:00:00	40.4871	39.8457
2017-07-18 03:48:00	38.7118			2019-09-14 05:00:00	40.4926	39.8617
2017-07-18 04:03:00	38.7188			2019-09-14 06:00:00	40.498	39.883
2017-07-18 04:18:00	38.7241			2019-09-14 07:00:00	40.5082	39.8991
2017-07-18 04:33:00	38.7311			2019-09-14 08:00:00	40.5136	39.9044
2017-07-18 04:48:00	38.7398			2019-09-14 09:00:00	40.5334	39.8973
2017-07-18 05:03:00	38.7468			2019-09-14 10:00:00	40.542	39.8848
2017-07-18 05:18:00	38.7538			2019-09-14 11:00:00	40.549	39.8688
2017-07-18 05:33:00	38.7573			2019-09-14 12:00:00	40.5592	39.8474
2017-07-18 05:48:00	38.7678			2019-09-14 13:00:00	40.5758	39.8332
2017-07-18 06:03:00	38.773			2019-09-14 14:00:00	40.5764	39.8332
2017-07-18 06:18:00	38.7783			2019-09-14 15:00:00	40.5738	39.8421
2017-07-18 06:33:00	38.7818			2019-09-14 16:00:00	40.5872	39.8546
2017-07-18 06:48:00	38.7835			2019-09-14 17:00:00	40.5863	39.883
2017-07-18 07:03:00	38.7871			2019-09-14 18:00:00	40.5901	39.9044
2017-07-18 07:18:00	38.7871			2019-09-14 19:00:00	40.5907	39.924
2017-07-18 07:33:00	38.7853			2019-09-14 20:00:00	40.5962	39.9293
2017-07-18 07:48:00	38.7871			2019-09-14 21:00:00	40.6143	39.9222
2017-07-18 08:03:00	38.7871			2019-09-14 22:00:00	40.6197	39.9062
2017-07-18 08:18:00	38.7871			2019-09-14 23:00:00	40.6236	39.8919
2017-07-18 08:33:00	38.7818			2019-09-15	40.6242	39.8635
2017-07-18 08:48:00	38.7818			2019-09-15 01:00:00	40.6264	39.8581
2017-07-18 09:03:00	38.7783			2019-09-15 02:00:00	40.6414	39.8279
2017-07-18 09:18:00	38.7748			2019-09-15 03:00:00	40.6548	39.8314
2017-07-18 09:33:00	38.7678			2019-09-15 04:00:00	40.6602	39.8439
2017-07-18 09:48:00	38.7643			2019-09-15 05:00:00	40.6656	39.8528
2017-07-18 10:03:00	38.7573			2019-09-15 06:00:00	40.6663	39.8759
2017-07-18 10:18:00	38.7521			2019-09-15 07:00:00	40.6717	39.8955
2017-07-18 10:33:00	38.7433			2019-09-15 08:00:00	40.6771	39.9062
2017-07-18 10:48:00	38.7416			2019-09-15 09:00:00	40.6825	39.9026
2017-07-18 11:03:00	38.7328			2019-09-15 10:00:00	40.6879	39.8955
2017-07-18 11:18:00	38.7258			2019-09-15 11:00:00	40.6934	39.8795
2017-07-18 11:33:00	38.7188			2019-09-15 12:00:00	40.6988	39.8581
2017-07-18 11:48:00	38.7153			2019-09-15 13:00:00	40.701	39.8332
2017-07-18 12:03:00	38.7083			2019-09-15 14:00:00	40.7064	39.819
2017-07-18 12:18:00	38.7031			2019-09-15 15:00:00	40.7118	39.8225
2017-07-18 12:33:00	38.6996			2019-09-15 16:00:00	40.7172	39.8368
2017-07-18 12:48:00	38.6926			2019-09-15 17:00:00	40.7354	39.8546
2017-07-18 13:03:00	38.6839			2019-09-15 18:00:00	40.7456	39.8813
2017-07-18 13:18:00	38.6786			2019-09-15 19:00:00	40.7542	39.9026
2017-07-18 13:33:00	38.6786			2019-09-15 20:00:00	40.7629	39.9097
2017-07-18 13:48:00	38.6769			2019-09-15 21:00:00	40.7651	39.9097
2017-07-18 14:03:00	38.6734			2019-09-15 22:00:00	40.7705	39.8991
2017-07-18 14:18:00	38.6734			2019-09-15 23:00:00	40.7759	39.8848
2017-07-18 14:33:00	38.6699			2019-09-16	40.7797	39.8617
2017-07-18 14:48:00	38.6716			2019-09-16 01:00:00	40.7836	39.8421
2017-07-18 15:03:00	38.6716			2019-09-16 02:00:00	40.7874	39.819
2017-07-18 15:18:00	38.6734			2019-09-16 03:00:00	40.7896	39.8119
2017-07-18 15:33:00	38.6734			2019-09-16 04:00:00	40.7966	39.8154
2017-07-18 15:48:00	38.6751			2019-09-16 05:00:00	40.8004	39.8279
2017-07-18 16:03:00	38.6769			2019-09-16 06:00:00	40.8042	39.8528
2017-07-18 16:18:00	38.6804			2019-09-16 07:00:00	40.8049	39.8741
2017-07-18 16:33:00	38.6821			2019-09-16 08:00:00	40.8119	39.8937
2017-07-18 16:48:00	38.6926			2019-09-16 09:00:00	40.8157	39.9026
2017-07-18 17:03:00	38.6979			2019-09-16 10:00:00	40.8227	39.8919
2017-07-18 17:18:00	38.7031			2019-09-16 11:00:00	40.8265	39.8723
2017-07-18 17:33:00	38.7083			2019-09-16 12:00:00	40.8288	39.8528
2017-07-18 17:48:00	38.7136			2019-09-16 13:00:00	40.8342	39.8279
2017-07-18 18:03:00	38.7188			2019-09-16 14:00:00	40.8364	39.8137
2017-07-18 18:18:00	38.7241			2019-09-16 15:00:00	40.8418	39.8101
2017-07-18 18:33:00	38.7311			2019-09-16 16:00:00	40.8441	39.8208
2017-07-18 18:48:00	38.7363			2019-09-16 17:00:00	40.8463	39.8403
2017-07-18 19:03:00	38.7398			2019-09-16 18:00:00	40.8485	39.8581
2017-07-18 19:18:00	38.7398			2019-09-16 19:00:00	40.8539	39.8848
2017-07-18 19:33:00	38.7468			2019-09-16 20:00:00	40.8577	39.8991
2017-07-18 19:48:00	38.7503			2019-09-16 21:00:00	40.8632	39.9097
2017-07-18 20:03:00	38.7521			2019-09-16 22:00:00	40.867	39.9044
2017-07-18 20:18:00	38.7538			2019-09-16 23:00:00	40.8724	39.8866
2017-07-18 20:33:00	38.7556			2019-09-17	40.873	39.8635
2017-07-18 20:48:00	38.7556			2019-09-17 01:00:00	40.8753	39.8492
2017-07-18 21:03:00	38.7556			2019-09-17 02:00:00	40.8807	39.8279
2017-07-18 21:18:00	38.7538			2019-09-17 03:00:00	40.8861	39.8137
2017-07-18 21:33:00	38.7503			2019-09-17 04:00:00	40.8915	39.8154
2017-07-18 21:48:00	38.7468			2019-09-17 05:00:00	40.8921	39.8314
2017-07-18 22:03:00	38.7416			2019-09-17 06:00:00	40.8975	39.851
2017-07-18 22:18:00	38.7398			2019-09-17 07:00:00	40.9014	39.8723
2017-07-18 22:33:00	38.7381			2019-09-17 08:00:00	40.9036	39.8955
2017-07-18 22:48:00	38.7311			2019-09-17 09:00:00	40.9106	39.9079
2017-07-18 23:03:00	38.7276			2019-09-17 10:00:00	40.9128	39.9097
2017-07-18 23:18:00	38.7241			2019-09-17 11:00:00	40.9183	39.8991
2017-07-18 23:33:00	38.7188			2019-09-17 12:00:00	40.9221	39.8741
2017-07-18 23:48:00	38.7171			2019-09-17 13:00:00	40.9243	39.8528
2017-07-19 00:03:00	38.7136			2019-09-17 14:00:00	40.9297	39.8297
2017-07-19 00:18:00	38.7101			2019-09-17 15:00:00	40.9319	39.8261
2017-07-19 00:33:00	38.7031			2019-09-17 16:00:00	40.939	39.8172
2017-07-19 00:48:00	38.7031			2019-09-17 17:00:00	40.9412	39.8279
2017-07-19 01:03:00	38.7031			2019-09-17 18:00:00	40.9466	39.8457
2017-07-19 01:18:00	38.7013			2019-09-17 19:00:00	40.9536	39.867
2017-07-19 01:33:00	38.6996			2019-09-17 20:00:00	40.959	39.8955
2017-07-19 01:48:00	38.6996			2019-09-17 21:00:00	40.9628	39.9079
2017-07-19 02:03:00	38.7013			2019-09-17 22:00:00	40.9683	39.9079
2017-07-19 02:18:00	38.7013			2019-09-17 23:00:00	40.9705	39.8955
2017-07-19 02:33:00	38.7013			2019-09-18	40.9759	39.8777
2017-07-19 02:48:00	38.7031			2019-09-18 01:00:00	40.9797	39.8563
2017-07-19 03:03:00	38.7083			2019-09-18 02:00:00	40.9819	39.8332
2017-07-19 03:18:00	38.7136			2019-09-18 03:00:00	40.9874	39.819
2017-07-19 03:33:00	38.7188			2019-09-18 04:00:00	40.9912	39.8154
2017-07-19 03:48:00	38.7573			2019-09-18 05:00:00	40.995	39.8279
2017-07-19 04:03:00	38.7678			2019-09-18 06:00:00	40.9972	39.8439
2017-07-19 04:18:00	38.7766			2019-09-18 07:00:00	41.0027	39.8635
2017-07-19 04:33:00	38.7835			2019-09-18 08:00:00	41.0065	39.8919
2017-07-19 04:48:00	38.7853			2019-09-18 09:00:00	41.0103	39.9097
2017-07-19 05:03:00	38.7993			2019-09-18 10:00:00	41.0125	39.9222
2017-07-19 05:18:00	38.8098			2019-09-18 11:00:00	41.0147	39.9097
2017-07-19 05:33:00	38.8133			2019-09-18 12:00:00	41.0202	39.8955
2017-07-19 05:48:00	38.8238			2019-09-18 13:00:00	41.0192	39.8741
2017-07-19 06:03:00	38.8343			2019-09-18 14:00:00	41.0262	39.8563
2017-07-19 06:18:00	38.8396			2019-09-18 15:00:00	41.03	39.8439
2017-07-19 06:33:00	38.8483			2019-09-18 16:00:00	41.0339	39.8332
2017-07-19 06:48:00	38.8553			2019-09-18 17:00:00	41.0329	39.8421
2017-07-19 07:03:00	38.8606			2019-09-18 18:00:00	41.0415	39.8528
2017-07-19 07:18:00	38.8623			2019-09-18 19:00:00	41.0453	39.8706
2017-07-19 07:33:00	38.8694			2019-09-18 20:00:00	41.0476	39.8919
2017-07-19 07:48:00	38.8746			2019-09-18 21:00:00	41.053	39.9044
2017-07-19 08:03:00	38.8799			2019-09-18 22:00:00	41.0552	39.9062
2017-07-19 08:18:00	38.8834			2019-09-18 23:00:00	41.0558	39.9026
2017-07-19 08:33:00	38.8799			2019-09-19	41.0644	39.8866
2017-07-19 08:48:00	38.8799			2019-09-19 01:00:00	41.0699	39.867
2017-07-19 09:03:00	38.8816			2019-09-19 02:00:00	41.0673	39.851
2017-07-19 09:18:00	38.8799			2019-09-19 03:00:00	41.0695	39.8297
2017-07-19 09:33:00	38.8799			2019-09-19 04:00:00	41.0733	39.8279
2017-07-19 09:48:00	38.8764			2019-09-19 05:00:00	41.0724	39.8261
2017-07-19 10:03:00	38.8711			2019-09-19 06:00:00	41.0746	39.8385
2017-07-19 10:18:00	38.8676			2019-09-19 07:00:00	41.0784	39.8563
2017-07-19 10:33:00	38.8623			2019-09-19 08:00:00	41.0807	39.8759
2017-07-19 10:48:00	38.8588			2019-09-19 09:00:00	41.0829	39.8955
2017-07-19 11:03:00	38.8501			2019-09-19 10:00:00	41.0851	39.9062
2017-07-19 11:18:00	38.8448			2019-09-19 11:00:00	41.0889	39.9062
2017-07-19 11:33:00	38.8378			2019-09-19 12:00:00	41.0896	39.8955
2017-07-19 11:48:00	38.8273			2019-09-19 13:00:00	41.0918	39.8777
2017-07-19 12:03:00	38.8203			2019-09-19 14:00:00	41.0972	39.8546
2017-07-19 12:18:00	38.8116			2019-09-19 15:00:00	41.0995	39.8403
2017-07-19 12:33:00	38.8081			2019-09-19 16:00:00	31.3368	39.8261
2017-07-19 12:48:00	38.7976			2019-09-19 17:00:00	34.4554	39.8279
2017-07-19 13:03:00	38.7871			2019-09-19 18:00:00	36.0942	39.8279
2017-07-19 13:18:00	38.7818			2019-09-19 19:00:00	37.0726	39.8421
2017-07-19 13:33:00	38.7766			2019-09-19 20:00:00	37.7671	39.8546
2017-07-19 13:48:00	38.7696			2019-09-19 21:00:00	38.2929	39.8723
2017-07-19 14:03:00	38.7678			2019-09-19 22:00:00	38.6994	39.8777
2017-07-19 14:18:00	38.7591			2019-09-19 23:00:00	39.0199	39.8741
2017-07-19 14:33:00	38.7591			2019-09-20	39.2817	39.8635
2017-07-19 14:48:00	38.7573			2019-09-20 01:00:00	39.4861	39.8528
2017-07-19 15:03:00	38.7538			2019-09-20 02:00:00	39.6657	39.8332
2017-07-19 15:18:00	38.7521			2019-09-20 03:00:00	39.8157	39.8261
2017-07-19 15:33:00	38.7503			2019-09-20 04:00:00	39.9439	39.8083
2017-07-19 15:48:00	38.7503			2019-09-20 05:00:00	40.0548	39.8048
2017-07-19 16:03:00	38.7521			2019-09-20 06:00:00	40.1501	39.8154
2017-07-19 16:18:00	38.7538			2019-09-20 07:00:00	40.2297	39.8297
2017-07-19 16:33:00	38.7573			2019-09-20 08:00:00	40.3046	39.8474
2017-07-19 16:48:00	38.7573			2019-09-20 09:00:00	40.3701	39.8617
2017-07-19 17:03:00	38.7626			2019-09-20 10:00:00	40.4324	39.8813
2017-07-19 17:18:00	38.7678			2019-09-20 11:00:00	40.4789	39.8937
2017-07-19 17:33:00	38.7748			2019-09-20 12:00:00	40.5334	39.8919
2017-07-19 17:48:00	38.8694			2019-09-20 13:00:00	40.5768	39.8777
2017-07-19 18:03:00	39.2155			2019-09-20 14:00:00	40.6171	39.8635
2017-07-19 18:18:00	39.2701			2019-09-20 15:00:00	40.6589	39.851
2017-07-19 18:33:00	39.2913			2019-09-20 16:00:00	40.685	39.835
2017-07-19 18:48:00	39.3001			2019-09-20 17:00:00	40.7126	39.8243
2017-07-19 19:03:00	39.3071			2019-09-20 18:00:00	40.7513	39.8243
2017-07-19 19:18:00	39.3142			2019-09-20 19:00:00	40.7789	39.8314
2017-07-19 19:33:00	39.3212			2019-09-20 20:00:00	40.7923	39.8457
2017-07-19 19:48:00	39.3248			2019-09-20 21:00:00	40.8278	39.8599
2017-07-19 20:03:00	39.3318			2019-09-20 22:00:00	40.8443	39.8741
2017-07-19 20:18:00	39.3407			2019-09-20 23:00:00	40.872	39.8777
2017-07-19 20:33:00	39.3477			2019-09-21	40.8822	39.8741
2017-07-19 20:48:00	39.3513			2019-09-21 01:00:00	40.9066	39.8635
2017-07-19 21:03:00	39.3548			2019-09-21 02:00:00	40.9184	39.8581
2017-07-19 21:18:00	39.3565			2019-09-21 03:00:00	40.9365	39.8457
2017-07-19 21:33:00	39.3565			2019-09-21 04:00:00	40.9499	39.8403
2017-07-19 21:48:00	39.3583			2019-09-21 05:00:00	40.9616	39.8314
2017-07-19 22:03:00	39.3636			2019-09-21 06:00:00	40.9734	39.8261
2017-07-19 22:18:00	39.3618			2019-09-21 07:00:00	40.9899	39.8332
2017-07-19 22:33:00	39.3636			2019-09-21 08:00:00	41.0033	39.8474
2017-07-19 22:48:00	39.3654			2019-09-21 09:00:00	41.0135	39.8617
2017-07-19 23:03:00	39.3654			2019-09-21 10:00:00	41.0284	39.8777
2017-07-19 23:18:00	39.3636			2019-09-21 11:00:00	41.0386	39.8901
2017-07-19 23:33:00	39.3636			2019-09-21 12:00:00	41.0504	39.8919
2017-07-19 23:48:00	39.3636			2019-09-21 13:00:00	41.0638	39.8795
2017-07-20 00:03:00	39.3672			2019-09-21 14:00:00	41.0676	39.8652
2017-07-20 00:18:00	39.3654			2019-09-21 15:00:00	41.0762	39.8528
2017-07-20 00:33:00	39.3654			2019-09-21 16:00:00	41.08	39.8297
2017-07-20 00:48:00	39.3654			2019-09-21 17:00:00	41.0886	39.8119
2017-07-20 01:03:00	39.3636			2019-09-21 18:00:00	41.0908	39.7994
2017-07-20 01:18:00	39.3636			2019-09-21 19:00:00	41.0963	39.7959
2017-07-20 01:33:00	39.3636			2019-09-21 20:00:00	41.1017	39.803
2017-07-20 01:48:00	39.3618			2019-09-21 21:00:00	41.1071	39.8048
2017-07-20 02:03:00	39.3636			2019-09-21 22:00:00	41.1093	39.8137
2017-07-20 02:18:00	39.3618			2019-09-21 23:00:00	41.1084	39.819
2017-07-20 02:33:00	39.3618			2019-09-22	40.9883	39.819
2017-07-20 02:48:00	39.3583			2019-09-22 01:00:00	36.8004	39.8119
2017-07-20 03:03:00	39.3583			2019-09-22 02:00:00	31.887	39.803
2017-07-20 03:18:00	39.3583			2019-09-22 03:00:00	27.1925	39.787
2017-07-20 03:33:00	39.3548			2019-09-22 04:00:00	26.5087	39.771
2017-07-20 03:48:00	39.3513			2019-09-22 05:00:00	26.249	39.7426
2017-07-20 04:03:00	39.3495			2019-09-22 06:00:00	26.1069	39.7177
2017-07-20 04:18:00	39.3495			2019-09-22 07:00:00	26.2136	39.7124
2017-07-20 04:33:00	39.3495			2019-09-22 08:00:00	26.0343	39.7141
2017-07-20 04:48:00	39.3477			2019-09-22 09:00:00	26.0486	39.7177
2017-07-20 05:03:00	39.3495			2019-09-22 10:00:00	27.3093	39.7355
2017-07-20 05:18:00	39.3513			2019-09-22 11:00:00	28.6753	39.7408
2017-07-20 05:33:00	39.3513			2019-09-22 12:00:00	29.8289	39.7479
2017-07-20 05:48:00	39.3548			2019-09-22 13:00:00	30.8274	39.7514
2017-07-20 06:03:00	39.3565			2019-09-22 14:00:00	31.6921	39.7461
2017-07-20 06:18:00	39.3583			2019-09-22 15:00:00	32.4359	39.7195
2017-07-20 06:33:00	39.3618			2019-09-22 16:00:00	33.0872	39.6716
2017-07-20 06:48:00	39.3654			2019-09-22 17:00:00	33.6467	39.6131
2017-07-20 07:03:00	39.3654			2019-09-22 18:00:00	34.1353	39.5812
2017-07-20 07:18:00	39.3689			2019-09-22 19:00:00	34.5646	39.5457
2017-07-20 07:33:00	39.3689			2019-09-22 20:00:00	34.9509	39.5351
2017-07-20 07:48:00	39.376			2019-09-22 21:00:00	35.3001	39.5351
2017-07-20 08:03:00	39.3813			2019-09-22 22:00:00	35.5999	39.5386
2017-07-20 08:18:00	39.383			2019-09-22 23:00:00	35.8895	39.5493
2017-07-20 08:33:00	39.3883			2019-09-23	36.143	39.5422
2017-07-20 08:48:00	39.3883			2019-09-23 01:00:00	36.3802	39.5333
2017-07-20 09:03:00	39.3883			2019-09-23 02:00:00	36.5917	39.5121
2017-07-20 09:18:00	39.3883			2019-09-23 03:00:00	36.7974	39.4944
2017-07-20 09:33:00	39.3883			2019-09-23 04:00:00	36.9758	39.4802
2017-07-20 09:48:00	39.3883			2019-09-23 05:00:00	37.1482	39.4749
2017-07-20 10:03:00	39.3883			2019-09-23 06:00:00	37.3071	39.4714
2017-07-20 10:18:00	39.3883			2019-09-23 07:00:00	37.4553	39.4714
2017-07-20 10:33:00	39.3883			2019-09-23 08:00:00	37.6007	39.4802
2017-07-20 10:48:00	39.3883			2019-09-23 09:00:00	37.7277	39.4891
2017-07-20 11:03:00	39.3883			2019-09-23 10:00:00	37.8517	39.5086
2017-07-20 11:18:00	39.3866			2019-09-23 11:00:00	37.9712	39.5333
2017-07-20 11:33:00	39.3883			2019-09-23 12:00:00	38.0862	39.5617
2017-07-20 11:48:00	39.3866			2019-09-23 13:00:00	38.1858	39.6006
2017-07-20 12:03:00	39.3883			2019-09-23 14:00:00	38.2762	39.6326
2017-07-20 12:18:00	39.3848			2019-09-23 15:00:00	38.3713	39.6485
2017-07-20 12:33:00	39.3848			2019-09-23 16:00:00	38.4618	39.6574
2017-07-20 12:48:00	39.3795			2019-09-23 17:00:00	38.5478	39.6521
2017-07-20 13:03:00	39.3742			2019-09-23 18:00:00	38.6353	39.6396
2017-07-20 13:18:00	39.3689			2019-09-23 19:00:00	38.7074	39.6237
2017-07-20 13:33:00	39.3672			2019-09-23 20:00:00	38.7811	39.6131
2017-07-20 13:48:00	39.3672			2019-09-23 21:00:00	38.8533	39.6131
2017-07-20 14:03:00	39.3636			2019-09-23 22:00:00	38.9161	39.6184
2017-07-20 14:18:00	39.3583			2019-09-23 23:00:00	38.9759	39.6343
2017-07-20 14:33:00	39.3548			2019-09-24	39.0482	39.6467
2017-07-20 14:48:00	39.3513			2019-09-24 01:00:00	39.1018	39.6609
2017-07-20 15:03:00	39.3389			2019-09-24 02:00:00	39.1555	39.6822
2017-07-20 15:18:00	39.3248			2019-09-24 03:00:00	39.22	39.6929
2017-07-20 15:33:00	39.316			2019-09-24 04:00:00	39.2691	39.6946
2017-07-20 15:48:00	39.3107			2019-09-24 05:00:00	39.3197	39.6964
2017-07-20 16:03:00	39.3071			2019-09-24 06:00:00	39.3703	39.6893
2017-07-20 16:18:00	39.3054			2019-09-24 07:00:00	39.4116	39.6787
2017-07-20 16:33:00	39.2966			2019-09-24 08:00:00	39.4606	39.6698
2017-07-20 16:48:00	39.293			2019-09-24 09:00:00	39.5082	39.6645
2017-07-20 17:03:00	39.2913			2019-09-24 10:00:00	39.5495	39.6662
2017-07-20 17:18:00	39.293			2019-09-24 11:00:00	39.5877	39.6804
2017-07-20 17:33:00	39.2895			2019-09-24 12:00:00	39.6353	39.6875
2017-07-20 17:48:00	39.2877			2019-09-24 13:00:00	39.6688	39.7035
2017-07-20 18:03:00	39.2895			2019-09-24 14:00:00	39.7211	39.723
2017-07-20 18:18:00	39.293			2019-09-24 15:00:00	39.7469	39.7408
2017-07-20 18:33:00	39.293			2019-09-24 16:00:00	39.782	39.7532
2017-07-20 18:48:00	39.3019			2019-09-24 17:00:00	39.8187	39.7514
2017-07-20 19:03:00	39.3071			2019-09-24 18:00:00	39.8585	39.7408
2017-07-20 19:18:00	39.3107			2019-09-24 19:00:00	39.8874	39.7141
2017-07-20 19:33:00	39.316			2019-09-24 20:00:00	39.9147	39.6893
2017-07-20 19:48:00	39.323			2019-09-24 21:00:00	39.9452	39.6574
2017-07-20 20:03:00	39.3265			2019-09-24 22:00:00	39.9804	39.6379
2017-07-20 20:18:00	39.3336			2019-09-24 23:00:00	40.0124	39.6272
2017-07-20 20:33:00	39.3371			2019-09-25	40.0429	39.6272
2017-07-20 20:48:00	39.3424			2019-09-25 01:00:00	40.0687	39.6396
2017-07-20 21:03:00	39.3513			2019-09-25 02:00:00	40.0913	39.6574
2017-07-20 21:18:00	39.3548			2019-09-25 03:00:00	40.1187	39.684
2017-07-20 21:33:00	39.3618			2019-09-25 04:00:00	40.1429	39.7
2017-07-20 21:48:00	39.3689			2019-09-25 05:00:00	40.175	39.7141
2017-07-20 22:03:00	39.3672			2019-09-25 06:00:00	40.2008	39.7124
2017-07-20 22:18:00	39.3689			2019-09-25 07:00:00	40.2282	39.7017
2017-07-20 22:33:00	39.3689			2019-09-25 08:00:00	40.2383	39.684
2017-07-20 22:48:00	39.3689			2019-09-25 09:00:00	40.2641	39.6751
2017-07-20 23:03:00	39.3707			2019-09-25 10:00:00	40.2915	39.6609
2017-07-20 23:18:00	39.3724			2019-09-25 11:00:00	40.3048	39.6609
2017-07-20 23:33:00	39.376			2019-09-25 12:00:00	40.3337	39.6733
2017-07-20 23:48:00	39.376			2019-09-25 13:00:00	40.3502	39.6893
2017-07-21 00:03:00	39.3777			2019-09-25 14:00:00	40.3744	39.7141
2017-07-21 00:18:00	39.3777			2019-09-25 15:00:00	40.3908	39.7408
2017-07-21 00:33:00	39.3777			2019-09-25 16:00:00	40.4167	39.7621
2017-07-21 00:48:00	39.3795			2019-09-25 17:00:00	40.4252	39.7763
2017-07-21 01:03:00	39.3795			2019-09-25 18:00:00	40.4511	39.7763
2017-07-21 01:18:00	39.3795			2019-09-25 19:00:00	40.4596	39.7603
2017-07-21 01:33:00	39.3777			2019-09-25 20:00:00	40.4855	39.7372
2017-07-21 01:48:00	39.376			2019-09-25 21:00:00	40.4987	39.7124
2017-07-21 02:03:00	39.376			2019-09-25 22:00:00	40.5246	39.6822
2017-07-21 02:18:00	39.3742			2019-09-25 23:00:00	40.5332	39.6609
2017-07-21 02:33:00	39.3724			2019-09-26	40.5449	39.6574
2017-07-21 02:48:00	39.3689			2019-09-26 01:00:00	40.5597	39.6751
2017-07-21 03:03:00	39.3689			2019-09-26 02:00:00	40.5777	39.6929
2017-07-21 03:18:00	39.3672			2019-09-26 03:00:00	40.5863	39.7159
2017-07-21 03:33:00	39.3689			2019-09-26 04:00:00	40.5948	39.7461
2017-07-21 03:48:00	39.3654			2019-09-26 05:00:00	40.6081	39.7621
2017-07-21 04:03:00	39.3672			2019-09-26 06:00:00	40.6214	39.7674
2017-07-21 04:18:00	39.3654			2019-09-26 07:00:00	40.6331	39.7621
2017-07-21 04:33:00	39.3618			2019-09-26 08:00:00	40.6464	39.7426
2017-07-21 04:48:00	39.3618			2019-09-26 09:00:00	40.6565	39.7141
2017-07-21 05:03:00	39.3565			2019-09-26 10:00:00	40.6619	39.6929
2017-07-21 05:18:00	39.3565			2019-09-26 11:00:00	40.6737	39.6751
2017-07-21 05:33:00	39.3565			2019-09-26 12:00:00	40.6775	39.6716
2017-07-21 05:48:00	39.3583			2019-09-26 13:00:00	40.7317	39.6751
2017-07-21 06:03:00	39.3565			2019-09-26 14:00:00	40.7591	39.6911
2017-07-21 06:18:00	39.3565			2019-09-26 15:00:00	40.7661	39.7213
2017-07-21 06:33:00	39.3565			2019-09-26 16:00:00	40.8093	39.7514
2017-07-21 06:48:00	39.3583			2019-09-26 17:00:00	40.821	39.771
2017-07-21 07:03:00	39.3618			2019-09-26 18:00:00	40.8265	39.7799
2017-07-21 07:18:00	39.3618			2019-09-26 19:00:00	40.8319	39.7745
2017-07-21 07:33:00	39.3654			2019-09-26 20:00:00	40.8704	39.7585
2017-07-21 07:48:00	39.3689			2019-09-26 21:00:00	40.8821	39.7337
2017-07-21 08:03:00	39.3654			2019-09-26 22:00:00	40.8922	39.7
2017-07-21 08:18:00	39.3689			2019-09-26 23:00:00	40.8992	39.6751
2017-07-21 08:33:00	39.3689			2019-09-27	40.9047	39.6591
2017-07-21 08:48:00	39.3742			2019-09-27 01:00:00	40.9164	39.6591
2017-07-21 09:03:00	39.3795			2019-09-27 02:00:00	40.9249	39.6751
2017-07-21 09:18:00	39.383			2019-09-27 03:00:00	40.9256	39.6982
2017-07-21 09:33:00	39.3848			2019-09-27 04:00:00	40.9374	39.7355
2017-07-21 09:48:00	39.3866			2019-09-27 05:00:00	40.9412	39.771
2017-07-21 10:03:00	39.3866			2019-09-27 06:00:00	40.9498	39.7941
2017-07-21 10:18:00	39.3901			2019-09-27 07:00:00	40.9552	39.7976
2017-07-21 10:33:00	39.3901			2019-09-27 08:00:00	40.9748	39.7923
2017-07-21 10:48:00	39.3919			2019-09-27 09:00:00	41.0054	39.771
2017-07-21 11:03:00	39.3883			2019-09-27 10:00:00	41.0156	39.7497
2017-07-21 11:18:00	39.3883			2019-09-27 11:00:00	41.0225	39.7124
2017-07-21 11:33:00	39.3883			2019-09-27 12:00:00	41.0311	39.6875
2017-07-21 11:48:00	39.3883			2019-09-27 13:00:00	41.0365	39.6787
2017-07-21 12:03:00	39.3883			2019-09-27 14:00:00	41.0419	39.6911
2017-07-21 12:18:00	39.3866			2019-09-27 15:00:00	41.0521	39.7017
2017-07-21 12:33:00	39.3866			2019-09-27 16:00:00	41.0544	39.7355
2017-07-21 12:48:00	39.3848			2019-09-27 17:00:00	41.0661	39.7657
2017-07-21 13:03:00	39.3866			2019-09-27 18:00:00	41.0999	39.7923
2017-07-21 13:18:00	39.3848			2019-09-27 19:00:00	41.1053	39.7976
2017-07-21 13:33:00	39.3813			2019-09-27 20:00:00	41.1139	39.787
2017-07-21 13:48:00	39.383			2019-09-27 21:00:00	41.1193	39.7692
2017-07-21 14:03:00	39.3795			2019-09-27 22:00:00	39.3756	39.7408
2017-07-21 14:18:00	39.376			2019-09-27 23:00:00	32.8226	39.7035
2017-07-21 14:33:00	39.3707			2019-09-28	29.1222	39.6804
2017-07-21 14:48:00	39.3689			2019-09-28 01:00:00	26.6257	39.6716
2017-07-21 15:03:00	39.3672			2019-09-28 02:00:00	25.0575	39.6787
2017-07-21 15:18:00	39.3672			2019-09-28 03:00:00	24.973	39.6982
2017-07-21 15:33:00	39.3636			2019-09-28 04:00:00	24.9784	39.7248
2017-07-21 15:48:00	39.3618			2019-09-28 05:00:00	24.9613	39.7674
2017-07-21 16:03:00	39.3548			2019-09-28 06:00:00	24.9353	39.803
2017-07-21 16:18:00	39.3495			2019-09-28 07:00:00	24.8897	39.8172
2017-07-21 16:33:00	39.3389			2019-09-28 08:00:00	24.8066	39.8261
2017-07-21 16:48:00	39.3283			2019-09-28 09:00:00	24.698	39.8119
2017-07-21 17:03:00	39.3212			2019-09-28 10:00:00	24.9824	39.7923
2017-07-21 17:18:00	39.3124			2019-09-28 11:00:00	26.0187	39.7603
2017-07-21 17:33:00	39.3071			2019-09-28 12:00:00	27.2353	39.7266
2017-07-21 17:48:00	39.3054			2019-09-28 13:00:00	28.2677	39.7124
2017-07-21 18:03:00	39.2966			2019-09-28 14:00:00	29.1534	39.7124
2017-07-21 18:18:00	39.2948			2019-09-28 15:00:00	29.9766	39.7284
2017-07-21 18:33:00	39.2948			2019-09-28 16:00:00	30.7064	39.7532
2017-07-21 18:48:00	39.2983			2019-09-28 17:00:00	31.3535	39.7923
2017-07-21 19:03:00	39.3071			2019-09-28 18:00:00	31.9267	39.8208
2017-07-21 19:18:00	39.3089			2019-09-28 19:00:00	32.4319	39.8457
2017-07-21 19:33:00	39.3124			2019-09-28 20:00:00	32.887	39.851
[truncated: 6,783 more rows]
